# Supplementary material for: Inactivating mutations of the chromatin remodeling gene ARID2 in hepatocellular carcinoma
Source: Springer Nature journal article supplement (doi:10.1038/ng.903), 2011-08-07
Supplement: 41588_2011_BFng903_MOESM19_ESM.pdf [file 41588_2011_BFng903_MOESM19_ESM.pdf]

## Supplementary information

### Inactivating mutations of the chromatin remodeling gene *ARID2* in hepatocellular carcinoma

Meng Li<sup>1,8</sup>, Hong Zhao<sup>2,8</sup>, Xiaosong Zhang<sup>3</sup>, Laura D. Wood<sup>4</sup>, Robert A. Anders<sup>4</sup>, Michael A. Choti<sup>5</sup>, Timothy M. Pawlik<sup>5</sup>, Hubert D. Daniel<sup>4</sup>, Rajesh Kannangai<sup>4</sup>, G. Johan A. Offerhaus<sup>6</sup>, Victor E. Velculescu<sup>1</sup>, Linfang Wang<sup>7</sup>, Shibin Zhou<sup>1</sup>, Bert Vogelstein<sup>1</sup>, Ralph H. Hruban<sup>4</sup>, Nick Papadopoulos<sup>1</sup>, Jianqiang Cai<sup>2</sup>, Michael S. Torbenson<sup>4</sup>, Kenneth W. Kinzler<sup>1</sup>

<sup>1</sup>Ludwig Center for Cancer Genetics and Therapeutics, Johns Hopkins University School of Medicine, Baltimore, MD 21231, USA.

<sup>2</sup>Department of Abdominal Surgical Oncology, Cancer Hospital, Chinese Academy of Medical Sciences and Peking Union Medical College, Beijing, 100021, P.R. China

<sup>3</sup>Department of Medicine, Massachusetts General Hospital, Boston, MA, 02114, USA

<sup>4</sup>Department of Pathology, Johns Hopkins University School of Medicine, Baltimore, MD 21231, USA

<sup>5</sup>Department of Surgery, Johns Hopkins University School of Medicine, Baltimore, MD, 21231, USA

<sup>6</sup>Department of Pathology, University Medical Center Utrecht, Utrecht, Netherlands

<sup>7</sup>National Laboratory of Medical Molecular Biology, Institute of Basic Medical Sciences, Chinese Academy of Medical Sciences and Peking Union Medical College, Beijing, 100730, P.R. China

<sup>8</sup>These authors contributed equally to this work.

Corresponding should be addressed to: K.W.K. ([kinzlike@jhmi.edu](mailto:kinzlike@jhmi.edu)); M.S.T. ([mtorben@jhmi.edu](mailto:mtorben@jhmi.edu)); J.C. ([caijianqiang188@sina.com](mailto:caijianqiang188@sina.com))

## Supplementary Methods

### Preparation of clinical samples

Fresh-frozen surgically resected tumor and matched normal adjacent tissues were obtained from patients treated at the Johns Hopkins Hospital, Cancer Institute and Hospital of Chinese Academy of Medical Sciences and Peking Union Medical College and University Medical Center Utrecht under Institutional Review Board protocols. Tumor tissue was analyzed by frozen section to assess neoplastic cellularity. Tumors were macrodissected to remove residual normal tissue and enhance neoplastic cellularity, as confirmed by multiple frozen sections. Normal tissue was also analyzed by frozen section to confirm the presence of only non-neoplastic tissue.

### Preparation of Illumina genomic DNA libraries

Genomic DNA libraries were prepared following Illumina's (Illumina, San Diego, CA) suggested protocol with the following modifications. **(1)** 3 micrograms ( $\mu\text{g}$ ) of genomic DNA from tumor or normal cells in 100 microliters ( $\mu\text{l}$ ) of TE was fragmented in a Covaris sonicator (Covaris, Woburn, MA) to a size of 100-500 bp. DNA was purified with a PCR purification kit (Cat # 28104, Qiagen, Valencia, CA) and eluted in 35  $\mu\text{l}$  of elution buffer included in the kit. **(2)** Purified, fragmented DNA was mixed with 40  $\mu\text{l}$  of  $\text{H}_2\text{O}$ , 10  $\mu\text{l}$  of 10 x T4 ligase buffer with 10 mM ATP, 4  $\mu\text{l}$  of 10 mM dNTP, 5  $\mu\text{l}$  of T4 DNA polymerase, 1  $\mu\text{l}$  of Klenow Polymerase, and 5  $\mu\text{l}$  of T4 polynucleotide Kinase. All reagents used for this step and those described below were from New England Biolabs (NEB, Ipswich, MA) unless otherwise specified. The 100  $\mu\text{l}$  end-repair mixture was incubated at 20°C for 30 min, purified by a PCR purification kit (Cat # 28104, Qiagen) and eluted with 32  $\mu\text{l}$  of elution buffer (EB). **(3)** To A-tail, all 32  $\mu\text{l}$  of end-repaired DNA was mixed with 5  $\mu\text{l}$  of 10 x Buffer (NEB buffer 2), 10  $\mu\text{l}$  of 1 mM dATP and 3  $\mu\text{l}$  of Klenow (exo-). The 50  $\mu\text{l}$  mixture was incubated at 37°C for 30 min before DNA was purified with a MinElute PCR purification kit (Cat # 28004, Qiagen). Purified DNA was eluted with 12.5  $\mu\text{l}$  of 70°C EB and obtained with 10  $\mu\text{l}$  of EB. **(4)** For adaptor ligation, 10  $\mu\text{l}$  of A-tailed DNA was mixed with 10  $\mu\text{l}$  of PE-adaptor (Illumina), 25  $\mu\text{l}$  of 2x Rapid ligase buffer and 5  $\mu\text{l}$  of Rapid Ligase. The ligation mixture was incubated at room temperature (RT) or 20°C for 15 min. **(5)** To purify adaptor-ligated DNA, 50  $\mu\text{l}$  of ligation mixture from step (4) was mixed with 200  $\mu\text{l}$  of NT buffer from NucleoSpin Extract II kit (cat# 636972, Clontech, Mountain View, CA) and loaded into NucleoSpin column. The column was centrifuged at 14000 g in a desktop centrifuge for 1 min, washed once with 600  $\mu\text{l}$  of wash buffer (NT3 from Clontech), and centrifuged again for 2 min to dry completely. DNA was eluted in 50  $\mu\text{l}$  elution buffer included in the kit. **(6)** To obtain an amplified library, ten PCRs of 25  $\mu\text{l}$  each were set up, each including 13.25  $\mu\text{l}$  of  $\text{H}_2\text{O}$ , 5  $\mu\text{l}$  of 5 x Phusion HF buffer, 0.5  $\mu\text{l}$  of a dNTP mix containing 10 mM of each dNTP, 0.5  $\mu\text{l}$  of Illumina PE primer #1, 0.5  $\mu\text{l}$  of Illumina PE primer #2, 0.25  $\mu\text{l}$  of Hotstart Phusion polymerase, and 5  $\mu\text{l}$  of the DNA from step (5). The PCR program used was: 98°C 1 minute; 6 cycles of 98°C for 20 seconds, 65°C for 30 seconds, 72°C for 30 seconds; and 72°C for 5 min. To purify the PCR product, 250  $\mu\text{l}$  PCR mixture (from the ten PCR reactions) was mixed with 500  $\mu\text{l}$  NT buffer from a NucleoSpin Extract II kit and purified as described in step (5). Library DNA was eluted with 70°C-warm elution buffer and the DNA concentration was estimated by absorption at 260 nm.

### Exome and targeted subgenomic DNA capture

Human exome capture was performed following a protocol from Agilent's SureSelect Paired-End Version 2.0 Human Exome Kit (Agilent, Santa Clara, CA) with the following modifications.

(1) A hybridization mixture was prepared containing 25  $\mu$ l of SureSelect Hyb # 1, 1  $\mu$ l of SureSelect Hyb # 2, 10  $\mu$ l of SureSelect Hyb # 3, and 13  $\mu$ l of SureSelect Hyb # 4. (2) 3.4  $\mu$ l (0.5  $\mu$ g) of the PE-library DNA described above, 2.5  $\mu$ l of SureSelect Block #1, 2.5  $\mu$ l of SureSelect Block #2 and 0.6  $\mu$ l of Block #3; was loaded into one well in a 384-well Diamond PCR plate (cat# AB-1111, Thermo-Scientific, Lafayette, CO), sealed with microAmp clear adhesive film (cat# 4306311; ABI, Carlsbad, CA) and placed in GeneAmp PCR system 9700 thermocycler (Life Sciences Inc., Carlsbad CA) for 5 minutes at 95°C, then held at 65°C (with the heated lid on). (3) 25-30  $\mu$ l of hybridization buffer from step (1) was heated for at least 5 minutes at 65°C in another sealed plate with heated lid on. (4) 5  $\mu$ l of SureSelect Oligo Capture Library, 1  $\mu$ l of nuclease-free water, and 1  $\mu$ l of diluted RNase Block (prepared by diluting RNase Block 1: 1 with nuclease-free water) were mixed and heated at 65°C for 2 minutes in another sealed 384-well plate. (5) While keeping all reactions at 65°C, 13  $\mu$ l of Hybridization Buffer from Step (3) was added to the 7  $\mu$ l of the SureSelect Capture Library Mix from Step (4) and then the entire contents (9  $\mu$ l) of the library from Step (2). The mixture was slowly pipetted up and down 8 to 10 times. (6) The 384-well plate was sealed tightly and the hybridization mixture was incubated for 24 hours at 65°C with a heated lid.

After hybridization, five steps were performed to recover and amplify captured DNA library: (1) Magnetic beads for recovering captured DNA: 50  $\mu$ l of Dynal MyOne Streptavidin C1 magnetic beads (Cat # 650.02, Invitrogen Dynal, AS Oslo, Norway) was placed in a 1.5 ml microfuge tube and vigorously resuspended on a vortex mixer. Beads were washed three times by adding 200  $\mu$ l of SureSelect Binding buffer, mixing on a vortex for five seconds and then removing the supernatant after placing the tubes in a Dynal magnetic separator. After the third wash, beads were resuspended in 200  $\mu$ l of SureSelect Binding buffer. (2) To bind captured DNA, the entire hybridization mixture described above (29  $\mu$ l) was transferred directly from the thermocycler to the bead solution and mixed gently; the hybridization mix /bead solution was incubated on an Eppendorf thermomixer at 850rpm for 30 minutes at room temperature. (3) To wash the beads, the supernatant was removed from beads after applying a Dynal magnetic separator and the beads were resuspended in 500  $\mu$ l SureSelect Wash Buffer #1 by mixing on vortex mixer for 5 seconds and incubated for 15 minutes at room temperature. Wash Buffer#1 was then removed from beads after magnetic separation. The beads were further washed three times, each with 500  $\mu$ l pre-warmed SureSelect Wash Buffer #2 after incubation at 65°C for 10 minutes. After the final wash, SureSelect Wash Buffer #2 was completely removed. (4) To elute captured DNA, the beads were suspended in 50  $\mu$ l SureSelect Elution Buffer, vortex-mixed and incubated for 10 minutes at room temperature. The supernatant was removed after magnetic separation, collected in a new 1.5 ml microcentrifuge tube, and mixed with 50  $\mu$ l of SureSelect Neutralization Buffer. DNA was purified with a Qiagen MinElute column and eluted in 17  $\mu$ l of 70°C EB to obtain 15  $\mu$ l of captured DNA library. (5) The captured DNA library was amplified in the following way: 15 PCR reactions each containing 9.5  $\mu$ l of H<sub>2</sub>O, 3  $\mu$ l of 5 x Phusion HF buffer, 0.3  $\mu$ l of 10 mM dNTP, 0.75  $\mu$ l of DMSO, 0.15  $\mu$ l of Illumina PE primer #1, 0.15  $\mu$ l of Illumina PE primer #2, 0.15  $\mu$ l of Hotstart Phusion polymerase, and 1  $\mu$ l of captured exome library were set up. The PCR program used was: 98°C for 30 seconds; 14 cycles of 98°C for 10 seconds, 65°C for 30 seconds, 72°C for 30 seconds; and 72°C for 5 min. To purify PCR products, 225  $\mu$ l PCR mixture (from 15 PCR reactions) was mixed with 450  $\mu$ l NT buffer from NucleoSpin Extract II kit and purified as described above. The final library DNA was eluted with 30  $\mu$ l of 70°C elution buffer and DNA concentration was estimated by OD260 measurement.

### **Somatic mutation identification by massively parallel sequencing**

Captured DNA libraries were sequenced with the Illumina GAIIx Genome Analyzer, yielding 150 (2 X 75) base pairs from the final library fragments. Sequencing reads were analyzed and aligned to human genome hg18 with the Eland algorithm in CASAVA 1.6 software (Illumina). A mismatched base was identified as a mutation only when (i) it was identified by more than three distinct tags; (ii) the number of distinct tags containing a particular mismatched base was at least 15% of the total distinct tags; and (iii) it was not present in >0.5% of the tags in the matched normal sample. SNP search databases included <http://www.ncbi.nlm.nih.gov/projects/SNP/> and <http://browser.1000genomes.org/index.html>.

### **Evaluation of genes in additional tumors and matched normal controls.**

For the *ARID2*, *CTNNB1*, *TP53*, *DMXL1* and *NLRP1* genes that were mutated in at least 2 tumors in the discovery screen, the coding region was sequenced in two validation sets, comprising additional 129 hepatocellular carcinoma tumors and matched controls. PCR amplification and Sanger sequencing were performed following protocols described previously<sup>1</sup> using the primers listed in supplementary table 4.

### **Statistics**

Two-tailed *P* values were calculated using Fisher's exact test.

### **References**

- S1. Sjoblom, T. et al. The consensus coding sequences of human breast and colorectal cancers. *Science* 314, 268-74 (2006).

### Supplementary Figure 1



**Supplementary Figure 1:** Number of non-synonymous somatic mutations identified through exome sequencing of 10 HCV-associated HCCs. Dotted line indicated the mean, 42.9 non-synonymous somatic mutations per HCC tumor.

## Supplementary Figure 2

**a**



**b**



**Supplementary Figure 2:** Somatic mutations in the *ARID2* gene. a. Examples of sequence chromatograms showing inactivating somatic mutations of *ARID2* in HCC tumors (lower panels) but not in matched normal control samples (upper panels). b. Somatic mutations identified in the *ARID2* gene. Truncating mutations are indicated by red arrows. ARID, AT-rich interaction domain; LXXLL, Leu-Xaa-Xaa-Leu-Leu motif; RFX, RFX-like DNA binding motif; ZnF, C2H2 Zinc Fingers.

**Supplementary Table 1.** Clinical characteristics of hepatocellular carcinoma samples used in the discovery screen

| Sample | Age | Sex    | Self-reported Ethnicity | Geographic location | Etiology | Stage | Source of tumor DNA | Histological type        | Source of matched normal DNA |
|--------|-----|--------|-------------------------|---------------------|----------|-------|---------------------|--------------------------|------------------------------|
| HCC03T | 67  | Male   | White                   | United States       | HCV      | T2    | Primary tumor       | Hepatocellular carcinoma | non-neoplastic liver         |
| HCC04T | 46  | Male   | White                   | United States       | HCV      | T1    | Primary tumor       | Hepatocellular carcinoma | non-neoplastic liver         |
| HCC06T | 59  | Female | White                   | United States       | HCV      | T2    | Primary tumor       | Hepatocellular carcinoma | non-neoplastic liver         |
| HCC07T | 59  | Male   | Black                   | United States       | HCV      | T1    | Primary tumor       | Hepatocellular carcinoma | non-neoplastic liver         |
| HCC08T | 51  | Female | White                   | United States       | HCV      | T2    | Primary tumor       | Hepatocellular carcinoma | non-neoplastic liver         |
| HCC09T | 56  | Female | Black                   | United States       | HCV      | T1    | Primary tumor       | Hepatocellular carcinoma | non-neoplastic liver         |
| HCC10T | 56  | Male   | White                   | United States       | HCV      | T2    | Primary tumor       | Hepatocellular carcinoma | non-neoplastic liver         |
| HCC11T | 60  | Male   | Black                   | United States       | HCV      | T3b   | Primary tumor       | Hepatocellular carcinoma | non-neoplastic liver         |
| HCC12T | 61  | Female | White                   | United States       | HCV      | T1    | Primary tumor       | Hepatocellular carcinoma | non-neoplastic liver         |
| HCC13T | 56  | Male   | Black                   | United States       | HCV      | T2    | Primary tumor       | Hepatocellular carcinoma | non-neoplastic liver         |

**Supplementary Table 2.** Summary of sequence analysis of hepatocellular carcinomas in the discovery screen

| Sample         | Sample type   | Bases in target region | Bases sequenced (after quality filtering) | Bases mapped to genome | Bases mapped to targeted region | Average # of reads per targeted base | Targeted bases with at least 10 reads (%) | Known SNPs identified in targeted region |
|----------------|---------------|------------------------|-------------------------------------------|------------------------|---------------------------------|--------------------------------------|-------------------------------------------|------------------------------------------|
| HCC03N         | Normal        | 37,806,033             | 13,471,487,250                            | 11,479,098,450         | 4,934,096,276                   | 128.0                                | 95.7%                                     | 21,265                                   |
| HCC03T         | Primary tumor | 37,806,033             | 12,150,135,150                            | 10,280,356,725         | 4,297,274,742                   | 106.7                                | 95.3%                                     | 21,146                                   |
| HCC04N         | Normal        | 37,806,033             | 11,657,716,350                            | 9,867,968,925          | 4,289,350,945                   | 111.1                                | 95.5%                                     | 19,363                                   |
| HCC04T         | Primary tumor | 37,806,033             | 13,162,622,850                            | 11,330,038,200         | 4,894,120,601                   | 123.0                                | 96.1%                                     | 19,373                                   |
| HCC06N         | Normal        | 37,806,033             | 7,977,985,350                             | 6,876,156,150          | 2,999,128,839                   | 78.8                                 | 93.9%                                     | 19,611                                   |
| HCC06T         | Primary tumor | 37,806,033             | 7,061,294,700                             | 6,114,484,125          | 2,642,547,690                   | 68.4                                 | 92.9%                                     | 19,334                                   |
| HCC07N         | Normal        | 37,806,033             | 7,073,294,550                             | 6,054,591,600          | 2,634,280,037                   | 69.3                                 | 93.1%                                     | 21,348                                   |
| HCC07T         | Primary tumor | 37,806,033             | 8,219,748,750                             | 7,050,607,500          | 3,036,867,954                   | 78.4                                 | 94.1%                                     | 21,349                                   |
| HCC08N         | Normal        | 37,806,033             | 10,833,485,250                            | 9,318,566,250          | 4,208,008,785                   | 109.9                                | 94.9%                                     | 19,619                                   |
| HCC08T         | Primary tumor | 37,806,033             | 9,666,538,050                             | 8,371,581,900          | 3,644,699,213                   | 92.9                                 | 94.7%                                     | 19,504                                   |
| HCC09N         | Normal        | 37,806,033             | 9,755,729,250                             | 8,183,036,250          | 3,524,782,995                   | 91.3                                 | 94.3%                                     | 21,434                                   |
| HCC09T         | Primary tumor | 37,806,033             | 11,109,517,050                            | 9,373,906,125          | 4,001,761,649                   | 99.5                                 | 95.1%                                     | 21,459                                   |
| HCC10N         | Normal        | 37,806,033             | 12,103,302,300                            | 10,467,227,175         | 4,710,373,502                   | 122.8                                | 95.6%                                     | 19,619                                   |
| HCC10T         | Primary tumor | 37,806,033             | 5,956,198,050                             | 5,142,645,450          | 2,210,413,571                   | 57.1                                 | 91.5%                                     | 19,293                                   |
| HCC11N         | Normal        | 37,806,033             | 11,595,139,200                            | 9,980,277,900          | 3,893,912,617                   | 101.7                                | 95.6%                                     | 21,456                                   |
| HCC11T         | Primary tumor | 37,806,033             | 12,791,470,800                            | 11,124,790,500         | 4,536,645,518                   | 114.1                                | 95.2%                                     | 21,360                                   |
| HCC12N         | Normal        | 37,806,033             | 12,767,426,775                            | 11,179,805,025         | 4,434,897,498                   | 115.1                                | 95.8%                                     | 19,476                                   |
| HCC12T         | Primary tumor | 37,806,033             | 16,577,510,850                            | 12,889,029,150         | 4,938,244,630                   | 117.6                                | 94.8%                                     | 19,339                                   |
| HCC13N         | Normal        | 37,806,033             | 8,932,602,600                             | 7,743,654,150          | 3,193,377,937                   | 83.3                                 | 94.7%                                     | 21,456                                   |
| HCC13T         | Primary tumor | 37,806,033             | 10,900,646,700                            | 9,335,411,400          | 4,038,932,281                   | 100.4                                | 95.5%                                     | 21,126                                   |
| <b>Average</b> |               | 37,806,033             | 10,688,192,591                            | 9,108,161,648          | 3,853,185,864                   | 98                                   | 94.7%                                     | 20,397                                   |

**Supplementary Table 3.** Non-synonymous somatic mutations identified in ten HCV-associated HCCs in the discovery screen

| Gene Symbol      | Gene ID         | Tumor Samples | Nucleotide (genomic)* | Amino acid (protein) | Mutation Type | Visual confirmation |
|------------------|-----------------|---------------|-----------------------|----------------------|---------------|---------------------|
| <i>CHD5</i>      | ENSG00000116254 | HCC08T        | g.chr1: 6126541T>C    | p. R658G             | Missense      | Yes                 |
| <i>GPR153</i>    | ENSG00000158292 | HCC03T        | g.chr1: 6237231G>A    | p. R108C             | Missense      | Yes                 |
| <i>SLC45A1</i>   | ENSG00000162426 | HCC07T        | g.chr1: 8320588A>G    | p. M575V             | Missense      | Yes                 |
| <i>REFE</i>      | ENSG00000142599 | HCC13T        | g.chr1: 8477799C>A    | p. A339S             | Missense      | Yes                 |
| <i>UBR4</i>      | ENSG00000127481 | HCC10T        | g.chr1: 19396310C>A   | p. L310F             | Missense      | Yes                 |
| <i>KIF17</i>     | ENSG00000117245 | HCC11T        | g.chr1: 20887010C>A   | p. V466L             | Missense      | Yes                 |
| <i>SPOCD1</i>    | ENSG00000134668 | HCC09T        | g.chr1: 32053496C>T   | p. G9D               | Missense      | Yes                 |
| <i>TRIT1</i>     | ENSG0000043514  | HCC11T        | g.chr1: 40086327C>A   | p. D245Y             | Missense      | Yes                 |
| <i>PTPRF</i>     | ENSG00000142949 | HCC10T        | g.chr1: 43841783C>T   | p. T817I             | Missense      | Yes                 |
| <i>RAD54L</i>    | ENSG00000085999 | HCC03T        | g.chr1: 46499630G>C   | p. V293L             | Missense      | Yes                 |
| <i>PRPF38A</i>   | ENSG00000134748 | HCC11T        | g.chr1: 52646843T>A   | p. L102Q             | Missense      | Yes                 |
| <i>LRRIQ3</i>    | ENSG00000162620 | HCC07T        | g.chr1: 74280133G>A   | p. P357L             | Missense      | Yes                 |
| <i>LPHN2</i>     | ENSG00000117114 | HCC13T        | g.chr1: 82229247G>T   | p. D1348Y            | Missense      | Yes                 |
| <i>AMY2A</i>     | ENSG00000196318 | HCC07T        | g.chr1: 103963742A>T  | p. E186V             | Missense      | Yes                 |
| <i>CSF1</i>      | ENSG00000184371 | HCC08T        | g.chr1: 110268112G>T  | p. R449L             | Missense      | Yes                 |
| <i>VANGL1</i>    | ENSG00000173218 | HCC13T        | g.chr1: 116029605C>A  | p. N416K             | Missense      | Yes                 |
| <i>IGSF3</i>     | ENSG00000143061 | HCC10T        | g.chr1: 116960444C>T  | p. E68K              | Missense      | Yes                 |
| <i>CD2</i>       | ENSG00000116824 | HCC03T        | g.chr1: 117104591A>T  | p. T143S             | Missense      | Yes                 |
| <i>TTF2</i>      | ENSG00000116830 | HCC03T        | g.chr1: 117419846G>T  | p. D373Y             | Missense      | Yes                 |
| <i>HIST2H3D</i>  | ENSG00000183598 | HCC10T        | g.chr1: 148051779T>A  | p. K28X              | Nonsense      | Yes                 |
| <i>PGLYRP3</i>   | ENSG00000159527 | HCC03T        | g.chr1: 151543028C>G  | p. R153T             | Missense      | Yes                 |
| <i>S100A3</i>    | ENSG00000188015 | HCC10T        | g.chr1: 151787461A>T  | p. L42Q              | Missense      | Yes                 |
| <i>TMEM79</i>    | ENSG00000163472 | HCC08T        | g.chr1: 154522815G>A  | p. V300M             | Missense      | Yes                 |
| <i>OR10R2</i>    | ENSG00000198965 | HCC08T        | g.chr1: 156717154C>A  | p. S288Y             | Missense      | Yes                 |
| <i>MNDA</i>      | ENSG00000163563 | HCC04T        | g.chr1: 157080438C>A  | p. P158T             | Missense      | Yes                 |
| <i>DUSP27</i>    | ENSG00000198842 | HCC03T        | g.chr1: 165363653delG | fs                   | Indel         | Yes                 |
| <i>SERPINC1</i>  | ENSG00000117601 | HCC10T        | g.chr1: 172146517T>C  | p. K254E             | Missense      | Yes                 |
| <i>TNN</i>       | ENSG00000120332 | HCC12T        | g.chr1: 173315304G>A  | p. G208R             | Missense      | Yes                 |
| <i>FAM5B</i>     | ENSG00000198797 | HCC13T        | g.chr1: 175465795C>T  | p. P54S              | Missense      | Yes                 |
| <i>DHX9</i>      | ENSG00000135829 | HCC07T        | g.chr1: 181113898G>T  | p. C773F             | Missense      | Yes                 |
| <i>RGL1</i>      | ENSG00000143344 | HCC07T        | g.chr1: 181977938A>T  | p. E8V               | Missense      | Yes                 |
| <i>TPR</i>       | ENSG0000047410  | HCC12T        | g.chr1: 184594299T>A  | p. Q499L             | Missense      | Yes                 |
| <i>LHX9</i>      | ENSG00000143355 | HCC13T        | g.chr1: 196155765C>T  | p. A72V              | Missense      | Yes                 |
| <i>CAMSAP1L1</i> | ENSG00000118200 | HCC09T        | g.chr1: 199084022G>A  | p. C501Y             | Missense      | Yes                 |
| <i>CAMSAP1L1</i> | ENSG00000118200 | HCC10T        | g.chr1: 199085516A>G  | p. D999G             | Missense      | Yes                 |
| <i>SYT2</i>      | ENSG00000143858 | HCC09T        | g.chr1: 200841410C>G  | p. E38D              | Missense      | Yes                 |
| <i>TMCC2</i>     | ENSG00000133069 | HCC11T        | g.chr1: 203477391T>C  | p. S115P             | Missense      | Yes                 |
| <i>SLC45A3</i>   | ENSG00000158715 | HCC07T        | g.chr1: 203897722A>G  | p. S372P             | Missense      | Yes                 |
| <i>PTPN14</i>    | ENSG00000152104 | HCC07T        | g.chr1: 212616239C>A  | p. E951D             | Missense      | Yes                 |
| <i>PTPN14</i>    | ENSG00000152104 | HCC07T        | g.chr1: 212616240T>A  | p. E951V             | Missense      | Yes                 |
| <i>SUSD4</i>     | ENSG00000143502 | HCC06T        | g.chr1: 221504717G>T  | p. P201Q             | Missense      | Yes                 |
| <i>ITPKB</i>     | ENSG00000143772 | HCC13T        | g.chr1: 224991020C>G  | p. V255L             | Missense      | Yes                 |
| <i>OR2T4</i>     | ENSG00000196944 | HCC06T        | g.chr1: 246591615A>G  | p. N37S              | Missense      | Yes                 |
| <i>TUBAL3</i>    | ENSG00000178462 | HCC09T        | g.chr10: 5425865T>C   | p. Y319C             | Missense      | Yes                 |
| <i>PLXDC2</i>    | ENSG00000120594 | HCC11T        | g.chr10: 20146074C>G  | p. F20L              | Missense      | Yes                 |
| <i>SLC18A3</i>   | ENSG00000187714 | HCC07T        | g.chr10: 50489703C>T  | p. P304L             | Missense      | Yes                 |
| <i>SGMS1</i>     | ENSG00000198964 | HCC06T        | g.chr10: 51773591C>A  | p. S97I              | Missense      | Yes                 |
| <i>MYPN</i>      | ENSG00000138347 | HCC09T        | g.chr10: 69629218G>C  | p. E1125Q            | Missense      | Yes                 |

|                 |                 |        |                             |           |             |     |
|-----------------|-----------------|--------|-----------------------------|-----------|-------------|-----|
| <i>HK1</i>      | ENSG00000156515 | HCC08T | g.chr10: 70799287C>T        | p. T263I  | Missense    | Yes |
| <i>PLCE1</i>    | ENSG00000138193 | HCC08T | g.chr10: 95781743G>A        | p. S317N  | Missense    | Yes |
| <i>COX15</i>    | ENSG00000014919 | HCC07T | g.chr10: 101479441C>T       | p. S44N   | Missense    | Yes |
| <i>ABCC2</i>    | ENSG00000023839 | HCC08T | g.chr10: 101559927A>G       | p. D621G  | Missense    | Yes |
| <i>COL17A1</i>  | ENSG00000065618 | HCC09T | g.chr10: 105810007C>T       | p. S334N  | Missense    | Yes |
| <i>PNLIPRP1</i> | ENSG00000187021 | HCC07T | g.chr10: 118354904G>T       | p. G397C  | Missense    | Yes |
| <i>PPP2R2D</i>  | ENSG00000175470 | HCC07T | g.chr10: 133611260G>A       | p. E126K  | Missense    | Yes |
| <i>SIGIRR</i>   | ENSG00000185187 | HCC13T | g.chr11: 397098G>A          | p. A231V  | Missense    | Yes |
| <i>HRAS</i>     | ENSG00000174775 | HCC09T | g.chr11: 523874T>A          | p. Q61L   | Missense    | Yes |
| <i>MARGPRE</i>  | ENSG00000184350 | HCC11T | g.chr11: 3205905C>A         | p. G233V  | Missense    | Yes |
| <i>ART1</i>     | ENSG00000129744 | HCC07T | g.chr11: 3637474A>G         | p. Y50C   | Missense    | Yes |
| <i>STIM1</i>    | ENSG00000167323 | HCC08T | g.chr11: 3945445A>G         | p. D76G   | Missense    | Yes |
| <i>ORS2N5</i>   | ENSG00000181009 | HCC11T | g.chr11: 5755509T>C         | p. K311R  | Missense    | Yes |
| <i>ST5</i>      | ENSG00000166444 | HCC07T | g.chr11: 8708425C>T         | p. A330T  | Missense    | Yes |
| <i>SAA4</i>     | ENSG00000148965 | HCC06T | g.chr11: 18214049T>C        | p. M1V    | Missense    | Yes |
| <i>MRGPRX2</i>  | ENSG00000183695 | HCC04T | g.chr11: 19034104C>T        | p. R141H  | Missense    | Yes |
| <i>OR4C12</i>   | ENSG00000221954 | HCC08T | g.chr11: 49959956A>T        | p. L220M  | Missense    | Yes |
| <i>ORSAP2</i>   | ENSG00000172464 | HCC07T | g.chr11: 56166000T>C        | p. I164M  | Missense    | Yes |
| <i>FAM111B</i>  | ENSG00000189057 | HCC07T | g.chr11: 58648985A>G        | p. H280R  | Missense    | Yes |
| <i>OR10V1</i>   | ENSG00000172289 | HCC04T | g.chr11: 59237796C>A        | p. M33I   | Missense    | Yes |
| <i>FADS2</i>    | ENSG00000134824 | HCC08T | g.chr11: 61387047A>G        | p. I304V  | Missense    | Yes |
| <i>RAB31L1</i>  | ENSG00000167994 | HCC04T | g.chr11: 61426573C>A        | p. G306W  | Missense    | Yes |
| <i>CDC42BPG</i> | ENSG00000171219 | HCC08T | g.chr11: 64359467C>A        | p. R627S  | Missense    | Yes |
| <i>IGHMBP2</i>  | ENSG00000132740 | HCC13T | g.chr11: 68460880G>A        | p. A786T  | Missense    | Yes |
| <i>P4HA3</i>    | ENSG00000149380 | HCC07T | g.chr11: 73674959C>T        | p. D299N  | Missense    | Yes |
| <i>SERPINH1</i> | ENSG00000149257 | HCC13T | g.chr11: 74957448A>G (Homo) | p. H216R  | Missense    | Yes |
| <i>C11orf30</i> | ENSG00000158636 | HCC07T | g.chr11: 75934715T>A        | p. I1167K | Missense    | Yes |
| <i>RAB30</i>    | ENSG00000137502 | HCC13T | g.chr11: 82370959G>A        | p. L170F  | Missense    | Yes |
| <i>PICALM</i>   | ENSG00000073921 | HCC13T | g.chr11: 85420301T>C (Homo) | p. Y44C   | Missense    | Yes |
| <i>GRIA4</i>    | ENSG00000152578 | HCC09T | g.chr11: 105300351T>A       | p. I498N  | Missense    | Yes |
| <i>CCDC84</i>   | ENSG00000186166 | HCC07T | g.chr11: 118387189C>T       | p. R167W  | Missense    | Yes |
| <i>GRIK4</i>    | ENSG00000149403 | HCC09T | g.chr11: 120358073G>T       | p. G815V  | Missense    | Yes |
| <i>TECTA</i>    | ENSG00000109927 | HCC03T | g.chr11: 120505630G>A       | p. S814N  | Missense    | Yes |
| <i>SORL1</i>    | ENSG00000137642 | HCC10T | g.chr11: 120950229A>G       | p. Y1136C | Missense    | Yes |
| <i>KCNA5</i>    | ENSG00000130037 | HCC06T | g.chr12: 5024323G>A         | p. R250Q  | Missense    | Yes |
| <i>CLEC7A</i>   | ENSG00000172243 | HCC03T | g.chr12: 10171277T>G        | p. X78Y   | Missense    | Yes |
| <i>CAPZA3</i>   | ENSG00000177938 | HCC13T | g.chr12: 18782614G>T        | p. E49X   | Nonsense    | Yes |
| <i>SLC01C1</i>  | ENSG00000139155 | HCC11T | g.chr12: 20781339C>A        | p. L472I  | Missense    | Yes |
| <i>SYT10</i>    | ENSG00000110975 | HCC13T | g.chr12: 33470355G>T        | p. P165H  | Missense    | Yes |
| <i>PRICKLE1</i> | ENSG00000139174 | HCC13T | g.chr12: 41139917C>G        | p. K819N  | Missense    | Yes |
| <i>ARID2</i>    | ENSG00000189079 | HCC07T | g.chr12: 44517604G>T        | p. E393X  | Nonsense    | Yes |
| <i>ARID2</i>    | ENSG00000189079 | HCC08T | g.chr12: 44531120C>T        | p. Q983X  | Nonsense    | Yes |
| <i>RPAP3</i>    | ENSG00000005175 | HCC11T | g.chr12: 46350389G>C        | p. L432V  | Missense    | Yes |
| <i>TUBA1C</i>   | ENSG00000167553 | HCC10T | g.chr12: 47952394G>A        | p. R156H  | Missense    | Yes |
| <i>KRT82</i>    | ENSG00000161850 | HCC10T | g.chr12: 51083941T>G        | p. K144T  | Missense    | Yes |
| <i>KRT6A</i>    | ENSG00000205420 | HCC13T | g.chr12: 51173161C>A        | p. G27W   | Missense    | Yes |
| <i>KRT8</i>     | ENSG00000170421 | HCC12T | g.chr12: 51584942A>C        | p. S31A   | Missense    | Yes |
| <i>SOAT2</i>    | ENSG00000167780 | HCC13T | g.chr12: 51798981G>A        | p. A302T  | Missense    | Yes |
| <i>HOXC9</i>    | ENSG00000180806 | HCC13T | g.chr12: 52680535C>A        | p. P99Q   | Missense    | Yes |
| <i>KIF5A</i>    | ENSG00000155980 | HCC08T | g.chr12: 56262667T>C        | p. I1003T | Missense    | Yes |
| <i>LRIG3</i>    | ENSG00000139263 | HCC08T | g.chr12: 57568487T>C        | p. K280E  | Missense    | Yes |
| <i>MIR1279</i>  | MI0006426       | HCC12T | g.chr12: 67953253T>G        | p. I5L    | Missense    | Yes |
| <i>KCNK2</i>    | ENSG00000166006 | HCC11T | g.chr12: 73730709C>A        | p. W448L  | Missense    | Yes |
| <i>ACSS3</i>    | ENSG00000111058 | HCC08T | g.chr12: 80149024G>T        | p. K524N  | Missense    | Yes |
| <i>ALX1</i>     | ENSG00000180318 | HCC07T | g.chr12: 84219151A>T        | p. T250S  | Missense    | Yes |
| <i>TMTC3</i>    | ENSG00000139324 | HCC13T | g.chr12: 87113266T>G        | p. I818M  | Missense    | Yes |
| <i>DCN</i>      | ENSG00000011465 | HCC10T | g.chr12: 90071099T>C        | IVS4-2    | Splice site | Yes |
| <i>ACAD10</i>   | ENSG00000111271 | HCC06T | g.chr12: 110624390A>T       | p. K77X   | Nonsense    | Yes |
| <i>NAA25</i>    | ENSG00000111300 | HCC07T | g.chr12: 110951728A>T       | p. L970Q  | Missense    | Yes |
| <i>DDX55</i>    | ENSG00000111364 | HCC12T | g.chr12: 122667082A>G       | p. Y343C  | Missense    | Yes |

|                  |                 |        |                              |           |             |     |
|------------------|-----------------|--------|------------------------------|-----------|-------------|-----|
| <i>ATP6V0A2</i>  | ENSG00000185344 | HCC07T | g.chr12: 122808438A>G        | p. Q826R  | Missense    | Yes |
| <i>TMEM132B</i>  | ENSG00000139364 | HCC03T | g.chr12: 124704258A>C        | p. E762D  | Missense    | Yes |
| <i>TMEM132D</i>  | ENSG00000151952 | HCC07T | g.chr12: 128135044C>T        | p. E534K  | Missense    | Yes |
| <i>MIPEP</i>     | ENSG00000027001 | HCC06T | g.chr13: 23282024T>C         | p. K565E  | Missense    | Yes |
| <i>HTR2A</i>     | ENSG00000102468 | HCC10T | g.chr13: 46307631G>A         | p. T253I  | Missense    | Yes |
| <i>KPNA3</i>     | ENSG00000102753 | HCC04T | g.chr13: 49174584T>C         | p. E469G  | Missense    | Yes |
| <i>TMTC4</i>     | ENSG00000125247 | HCC04T | g.chr13: 100092555C>G        | p. G218R  | Missense    | Yes |
| <i>NALCN</i>     | ENSG00000102452 | HCC12T | g.chr13: 100595163T>A        | p. Q642L  | Missense    | Yes |
| <i>TMCO3</i>     | ENSG00000150403 | HCC08T | g.chr13: 113198225G>A        | p. V110I  | Missense    | Yes |
| <i>OR4N2</i>     | ENSG00000176294 | HCC07T | g.chr14: 19366042A>G         | p. M199V  | Missense    | Yes |
| <i>OR4K5</i>     | ENSG00000176281 | HCC04T | g.chr14: 19458759G>C         | p. D52H   | Missense    | Yes |
| <i>OSGEP</i>     | ENSG00000092094 | HCC11T | g.chr14: 19985436G>A         | p. S318F  | Missense    | Yes |
| <i>NDRG2</i>     | ENSG00000165795 | HCC04T | g.chr14: 20557155G>A         | p. R241X  | Nonsense    | Yes |
| <i>MMP14</i>     | ENSG00000157227 | HCC07T | g.chr14: 22385034T>A         | p. H565Q  | Missense    | Yes |
| <i>EFS</i>       | ENSG00000100842 | HCC08T | g.chr14: 22897975C>T         | p. A401T  | Missense    | Yes |
| <i>MYH6</i>      | ENSG00000197616 | HCC03T | g.chr14: 22929455C>T         | p. R1128H | Missense    | Yes |
| <i>LRRC16B</i>   | ENSG00000186648 | HCC06T | g.chr14: 23600611G>C         | p. E790D  | Missense    | Yes |
| <i>LRFN5</i>     | ENSG00000165379 | HCC04T | g.chr14: 41425810G>T         | p. V78L   | Missense    | Yes |
| <i>C14orf106</i> | ENSG00000129534 | HCC06T | g.chr14: 44762886A>G         | p. L885S  | Missense    | Yes |
| <i>WDR89</i>     | ENSG00000140006 | HCC10T | g.chr14: 63136379T>C         | p. H12R   | Missense    | Yes |
| <i>GPHN</i>      | ENSG00000171723 | HCC04T | g.chr14: 66658784C>G         | p. T562S  | Missense    | Yes |
| <i>ZFP36L1</i>   | ENSG00000185650 | HCC11T | g.chr14: 68326506G>A         | p. R172C  | Missense    | Yes |
| <i>SFRS5</i>     | ENSG00000100650 | HCC11T | g.chr14: 69305146T>C         | IVS2+2    | Splice site | Yes |
| <i>PTPN21</i>    | ENSG00000070778 | HCC10T | g.chr14: 88044082A>G         | p. L129S  | Missense    | Yes |
| <i>ATG2B</i>     | ENSG00000066739 | HCC11T | g.chr14: 95841804T>A         | p. K1536N | Missense    | Yes |
| <i>HSP90AA1</i>  | ENSG00000080824 | HCC13T | g.chr14: 101619890T>G        | p. N566T  | Missense    | Yes |
| <i>GPR176</i>    | ENSG00000166073 | HCC03T | g.chr15: 37880741G>C         | p. P478A  | Missense    | Yes |
| <i>C15orf23</i>  | ENSG00000128944 | HCC10T | g.chr15: 38471505G>A         | p. E271K  | Missense    | Yes |
| <i>PLA2G4F</i>   | ENSG00000168907 | HCC11T | g.chr15: 40221647T>C         | p. I793V  | Missense    | Yes |
| <i>DMXL2</i>     | ENSG00000104093 | HCC03T | g.chr15: 49565693G>A         | p. S1784L | Missense    | Yes |
| <i>GCOM1</i>     | ENSG00000137878 | HCC07T | g.chr15: 55711991A>G         | p. Y249C  | Missense    | Yes |
| <i>ZWILCH</i>    | ENSG00000174442 | HCC10T | g.chr15: 64626046C>T         | p. T584I  | Missense    | Yes |
| <i>GOLGA6A</i>   | ENSG00000159289 | HCC09T | g.chr15: 72154035T>C         | p. Q403R  | Missense    | Yes |
| <i>CSPG4</i>     | ENSG00000173546 | HCC13T | g.chr15: 73769127G>A         | p. A445V  | Missense    | Yes |
| <i>ACSBG1</i>    | ENSG00000103740 | HCC04T | g.chr15: 76262178C>T         | p. W223X  | Nonsense    | Yes |
| <i>CASKIN1</i>   | ENSG00000167971 | HCC07T | g.chr16: 2171795A>G          | p. L589P  | Missense    | Yes |
| <i>ZC3H7A</i>    | ENSG00000122299 | HCC06T | g.chr16: 11772152C>G         | p. E366Q  | Missense    | Yes |
| <i>PDXDC1</i>    | ENSG00000179889 | HCC11T | g.chr16: 15003205A>C         | p. Q78P   | Missense    | Yes |
| <i>NOMO2</i>     | ENSG00000185164 | HCC10T | g.chr16: 18443327A>C (homo)  | p. F648C  | Missense    | Yes |
| <i>NOMO2</i>     | ENSG00000185164 | HCC10T | g.chr16: 18443348C>G         | p. C641S  | Missense    | Yes |
| <i>NOMO2</i>     | ENSG00000185164 | HCC10T | g.chr16: 18446438G>C         | p. Q606E  | Missense    | Yes |
| <i>C16orf62</i>  | ENSG00000103544 | HCC13T | g.chr16: 19618443G>A         | p. R922K  | Missense    | Yes |
| <i>DNAH3</i>     | ENSG00000158486 | HCC08T | g.chr16: 20950080A>G         | p. Y1743H | Missense    | Yes |
| <i>PRKCB</i>     | ENSG00000166501 | HCC11T | g.chr16: 24110005G>A         | p. E606K  | Missense    | Yes |
| <i>TNRC6A</i>    | ENSG00000090905 | HCC03T | g.chr16: 24741715G>T         | p. R1798L | Missense    | Yes |
| <i>SRCAP</i>     | ENSG00000080603 | HCC08T | g.chr16: 30632042C>T         | p. P715S  | Missense    | Yes |
| <i>CDH8</i>      | ENSG00000150394 | HCC11T | g.chr16: 60492584C>A         | p. G183C  | Missense    | Yes |
| <i>NFATC3</i>    | ENSG00000072736 | HCC13T | g.chr16: 66714443G>T         | p. D386Y  | Missense    | Yes |
| <i>SF3B3</i>     | ENSG00000189091 | HCC10T | g.chr16: 69133169G>T         | p. Q388H  | Missense    | Yes |
| <i>BCAR1</i>     | ENSG00000050820 | HCC13T | g.chr16: 73826522C>A         | p. Q592H  | Missense    | Yes |
| <i>CYBA</i>      | ENSG00000051523 | HCC11T | g.chr16: 87244916G>A         | p. Q3X    | Nonsense    | Yes |
| <i>MYO1C</i>     | ENSG00000197879 | HCC10T | g.chr17: 1318130T>C          | p. Y933C  | Missense    | Yes |
| <i>VMO1</i>      | ENSG00000182853 | HCC10T | g.chr17: 4635398C>A          | p. X203L  | Missense    | Yes |
| <i>NLRP1</i>     | ENSG00000091592 | HCC07T | g.chr17: 5376933C>T          | p. D1077N | Missense    | Yes |
| <i>NLRP1</i>     | ENSG00000091592 | HCC03T | g.chr17: 5402995T>G          | p. K582T  | Missense    | Yes |
| <i>ACAP1</i>     | ENSG00000072818 | HCC10T | g.chr17: 7190492A>G          | p. D322G  | Missense    | Yes |
| <i>TP53</i>      | ENSG00000141510 | HCC06T | g.chr17: 7514728G>A          | p. R342X  | Nonsense    | Yes |
| <i>TP53</i>      | ENSG00000141510 | HCC11T | g.chr17: 7519270delC         | fs        | Indel       | Yes |
| <i>TP53</i>      | ENSG00000141510 | HCC13T | g.chr17: 7520144_7520145dupG | fs        | Indel       | Yes |
| <i>FAM18B</i>    | ENSG00000171928 | HCC07T | g.chr17: 18642943G>A         | p. A142T  | Missense    | Yes |

|                 |                 |        |                               |           |             |     |
|-----------------|-----------------|--------|-------------------------------|-----------|-------------|-----|
| <i>ALDH3A2</i>  | ENSG00000072210 | HCC12T | g.chr17: 19495585A>C          | p. Y96S   | Missense    | Yes |
| <i>NF1</i>      | ENSG00000196712 | HCC10T | g.chr17: 26583846A>G          | p. Y1106C | Missense    | Yes |
| <i>RAD51L3</i>  | ENSG00000185379 | HCC03T | g.chr17: 30470720C>A          | p. C9F    | Missense    | Yes |
| <i>TBC1D3F</i>  | ENSG00000185128 | HCC09T | g.chr17: 33361565C>T          | p. A65V   | Missense    | Yes |
| <i>PLXDC1</i>   | ENSG00000161381 | HCC13T | g.chr17: 34549503T>A          | p. Q62L   | Missense    | Yes |
| <i>PPP1R1B</i>  | ENSG00000131771 | HCC07T | g.chr17: 35039328delC         | fs        | Indel       | Yes |
| <i>CCDC56</i>   | ENSG00000183978 | HCC10T | g.chr17: 38203713T>C          | IVS1-2    | Splice site | Yes |
| <i>MPP2</i>     | ENSG00000108852 | HCC12T | g.chr17: 39316098T>A          | p. Q101L  | Missense    | Yes |
| <i>GJC1</i>     | ENSG00000182963 | HCC07T | g.chr17: 40238573C>G          | p. E47Q   | Missense    | Yes |
| <i>GFAP</i>     | ENSG00000131095 | HCC06T | g.chr17: 40347974C>T          | p. R136Q  | Missense    | Yes |
| <i>NGFR</i>     | ENSG00000064300 | HCC09T | g.chr17: 44945087G>A          | p. G334D  | Missense    | Yes |
| <i>COL1A1</i>   | ENSG00000108821 | HCC13T | g.chr17: 45621265C>A          | p. E1015X | Nonsense    | Yes |
| <i>TMEM92</i>   | ENSG00000167105 | HCC13T | g.chr17: 45706871G>A          | p. A4T    | Missense    | Yes |
| <i>TEX14</i>    | ENSG00000121101 | HCC10T | g.chr17: 54031703C>T          | p. E668K  | Missense    | Yes |
| <i>GDPD1</i>    | ENSG00000153982 | HCC13T | g.chr17: 54666675G>T          | p. Q61H   | Missense    | Yes |
| <i>MED13</i>    | ENSG00000108510 | HCC04T | g.chr17: 57414458T>C          | p. N1230D | Missense    | Yes |
| <i>MARCH101</i> | ENSG00000173838 | HCC10T | g.chr17: 58191056A>C          | p. I85N   | Missense    | Yes |
| <i>LRRC37A3</i> | ENSG00000176809 | HCC03T | g.chr17: 60286293G>T          | p. T1478N | Missense    | Yes |
| <i>SLC39A11</i> | ENSG00000133195 | HCC11T | g.chr17: 68156565C>A          | p. D301Y  | Missense    | Yes |
| <i>ITGB4</i>    | ENSG00000132470 | HCC03T | g.chr17: 71258716C>T          | p. A1241V | Missense    | Yes |
| <i>FOXJ1</i>    | ENSG00000129654 | HCC12T | g.chr17: 71645721C>T          | p. G192R  | Missense    | Yes |
| <i>NPTX1</i>    | ENSG00000171246 | HCC07T | g.chr17: 76059407T>C          | p. D367G  | Missense    | Yes |
| <i>GNAL</i>     | ENSG00000141404 | HCC08T | g.chr18: 11679804T>C          | p. L81P   | Missense    | Yes |
| <i>KIAA1012</i> | ENSG00000153339 | HCC06T | g.chr18: 27701400A>C          | p. I809S  | Missense    | Yes |
| <i>MOCOS</i>    | ENSG00000075643 | HCC07T | g.chr18: 32029238G>T          | p. A55S   | Missense    | Yes |
| <i>PIK3C3</i>   | ENSG00000078142 | HCC04T | g.chr18: 37796490A>C          | p. D99A   | Missense    | Yes |
| <i>SMAD2</i>    | ENSG00000175387 | HCC13T | g.chr18: 43625724C>T          | p. W422X  | Nonsense    | Yes |
| <i>SERPINB2</i> | ENSG00000197632 | HCC10T | g.chr18: 59715396A>G          | p. N127S  | Missense    | Yes |
| <i>ADNP2</i>    | ENSG00000101544 | HCC13T | g.chr18: 75995053A>G          | p. K256E  | Missense    | Yes |
| <i>ZNF554</i>   | ENSG00000172006 | HCC10T | g.chr19: 2785327C>T           | p. S365F  | Missense    | Yes |
| <i>KDM4B</i>    | ENSG00000127663 | HCC13T | g.chr19: 4990959A>G           | p. Q85R   | Missense    | Yes |
| <i>TNFSF14</i>  | ENSG00000125735 | HCC04T | g.chr19: 6621079A>G           | p. M1T    | Missense    | Yes |
| <i>C19orf45</i> | ENSG00000198723 | HCC07T | g.chr19: 7476211T>A           | p. Y248N  | Missense    | Yes |
| <i>OR7G3</i>    | ENSG00000170920 | HCC11T | g.chr19: 9097917delG          | fs        | Indel       | Yes |
| <i>SMARCA4</i>  | ENSG00000127616 | HCC06T | g.chr19: 11029977C>T          | p. R1491X | Nonsense    | Yes |
| <i>OR10H3</i>   | ENSG00000171936 | HCC07T | g.chr19: 15713894C>T          | p. P231L  | Missense    | Yes |
| <i>CYP4F2</i>   | ENSG00000186115 | HCC04T | g.chr19: 15861343C>T          | p. V270I  | Missense    | Yes |
| <i>GDF15</i>    | ENSG00000130513 | HCC07T | g.chr19: 18358084G>A          | p. A29T   | Missense    | Yes |
| <i>NPHS1</i>    | ENSG00000161270 | HCC10T | g.chr19: 41014469C>T          | p. A1068T | Missense    | Yes |
| <i>APLP1</i>    | ENSG00000105290 | HCC04T | g.chr19: 41054613C>T          | p. R229W  | Missense    | Yes |
| <i>RYR1</i>     | ENSG00000196218 | HCC08T | g.chr19: 43668646G>C          | p. Q1837H | Missense    | Yes |
| <i>NCCRP1</i>   | ENSG00000188505 | HCC08T | g.chr19: 44380680A>T          | IVS2-2    | Splice site | Yes |
| <i>C19orf61</i> | ENSG00000105771 | HCC10T | g.chr19: 48928994C>T          | p. G447E  | Missense    | Yes |
| <i>APOC2</i>    | ENSG00000213044 | HCC13T | g.chr19: 50143911A>G          | p. N57D   | Missense    | Yes |
| <i>SYMPK</i>    | ENSG00000125755 | HCC10T | g.chr19: 51039203C>T          | p. G258S  | Missense    | Yes |
| <i>CGB1</i>     | ENSG00000204748 | HCC13T | g.chr19: 54230696G>T          | p. R151S  | Missense    | Yes |
| <i>SIGLEC9</i>  | ENSG00000129450 | HCC04T | g.chr19: 56322099T>C          | p. V250A  | Missense    | Yes |
| <i>SIGLEC6</i>  | ENSG00000105492 | HCC10T | g.chr19: 56725930C>A          | p. G164W  | Missense    | Yes |
| <i>LILRA1</i>   | ENSG00000104974 | HCC13T | g.chr19: 59798508C>A          | p. H164N  | Missense    | Yes |
| <i>NLRP2</i>    | ENSG0000022556  | HCC07T | g.chr19: 60186248G>A          | p. G457D  | Missense    | Yes |
| <i>EPS8L1</i>   | ENSG00000131037 | HCC08T | g.chr19: 60285459G>A          | p. R332Q  | Missense    | Yes |
| <i>EPS8L1</i>   | ENSG00000131037 | HCC04T | g.chr19: 60286815C>T          | p. A459V  | Missense    | Yes |
| <i>SOX11</i>    | ENSG00000176887 | HCC07T | g.chr2: 5750567A>T            | p. K88I   | Missense    | Yes |
| <i>LPIN1</i>    | ENSG00000134324 | HCC13T | g.chr2: 11837167G>T           | p. G265V  | Missense    | Yes |
| <i>APOB</i>     | ENSG00000084674 | HCC08T | g.chr2: 21086461T>C           | p. I2262V | Missense    | Yes |
| <i>FNDCA</i>    | ENSG00000115226 | HCC07T | g.chr2: 27571020_27571021dupG | fs        | Indel       | Yes |
| <i>FNDCA</i>    | ENSG00000115226 | HCC07T | g.chr2: 27571029A>G           | p. S8P    | Missense    | Yes |
| <i>ATP6V1B1</i> | ENSG00000116039 | HCC11T | g.chr2: 71040670G>A           | p. G180D  | Missense    | Yes |
| <i>C2orf65</i>  | ENSG00000159374 | HCC13T | g.chr2: 74639466G>A           | p. P493L  | Missense    | Yes |
| <i>POLR1A</i>   | ENSG00000068654 | HCC08T | g.chr2: 86158860G>T           | p. S382Y  | Missense    | Yes |

|                  |                 |        |                      |           |             |     |
|------------------|-----------------|--------|----------------------|-----------|-------------|-----|
| <i>AFF3</i>      | ENSG00000144218 | HCC07T | g.chr2: 99541776T>C  | p. Y1118C | Missense    | Yes |
| <i>MERTK</i>     | ENSG00000153208 | HCC10T | g.chr2: 112468363A>G | p. N454S  | Missense    | Yes |
| <i>HS6S1</i>     | ENSG00000136720 | HCC06T | g.chr2: 128792267A>C | p. V114G  | Missense    | Yes |
| <i>MGAT5</i>     | ENSG00000152127 | HCC12T | g.chr2: 134896877A>T | p. I571F  | Missense    | Yes |
| <i>RAB3GAP1</i>  | ENSG00000115839 | HCC13T | g.chr2: 135627797G>T | p. E724X  | Nonsense    | Yes |
| <i>LRP1B</i>     | ENSG00000168702 | HCC08T | g.chr2: 141382094C>T | p. W1114X | Nonsense    | Yes |
| <i>KYNU</i>      | ENSG00000115919 | HCC11T | g.chr2: 143516184A>G | p. I457M  | Missense    | Yes |
| <i>ACVR2A</i>    | ENSG00000121989 | HCC09T | g.chr2: 148319248T>A | IVS1+2    | Splice site | Yes |
| <i>RIF1</i>      | ENSG00000080345 | HCC08T | g.chr2: 151981620T>G | p. H154Q  | Missense    | Yes |
| <i>DPP4</i>      | ENSG00000197635 | HCC03T | g.chr2: 162638203C>A | p. A16S   | Missense    | Yes |
| <i>TLK1</i>      | ENSG00000198586 | HCC10T | g.chr2: 171593144T>C | p. Y396C  | Missense    | Yes |
| <i>EVX2</i>      | ENSG00000174279 | HCC10T | g.chr2: 176653701T>C | p. T271A  | Missense    | Yes |
| <i>NFE2L2</i>    | ENSG00000222043 | HCC13T | g.chr2: 177807047C>G | p. E82Q   | Missense    | Yes |
| <i>PDE11A</i>    | ENSG00000128655 | HCC10T | g.chr2: 178677297A>G | p. I47T   | Missense    | Yes |
| <i>TTN</i>       | ENSG00000155657 | HCC07T | g.chr2: 179349360C>T | p. G1826S | Missense    | Yes |
| <i>TMEFF2</i>    | ENSG00000144339 | HCC10T | g.chr2: 192630665T>G | p. D174A  | Missense    | Yes |
| <i>NBEAL1</i>    | ENSG00000144426 | HCC07T | g.chr2: 203770268A>T | IVS20-2   | Splice site | Yes |
| <i>PECR</i>      | ENSG00000115425 | HCC07T | g.chr2: 216654653T>G | p. Q19H   | Missense    | Yes |
| <i>SCG2</i>      | ENSG00000171951 | HCC07T | g.chr2: 224170576G>A | p. Q557X  | Nonsense    | Yes |
| <i>ALPP</i>      | ENSG00000163283 | HCC12T | g.chr2: 232952486A>T | p. H110L  | Missense    | Yes |
| <i>UGT1A6</i>    | ENSG00000167165 | HCC08T | g.chr2: 234255680T>C | p. F120L  | Missense    | Yes |
| <i>SLC4A11</i>   | ENSG00000088836 | HCC11T | g.chr20: 3157797C>G  | p. M670I  | Missense    | Yes |
| <i>SIGLEC1</i>   | ENSG00000088827 | HCC10T | g.chr20: 3627917T>A  | p. Y573F  | Missense    | Yes |
| <i>PLCB1</i>     | ENSG00000182621 | HCC07T | g.chr20: 8557019C>T  | p. P109S  | Missense    | Yes |
| <i>PLCB1</i>     | ENSG00000182621 | HCC07T | g.chr20: 8557020C>G  | p. P109R  | Missense    | Yes |
| <i>C20orf103</i> | ENSG00000125869 | HCC11T | g.chr20: 9444767C>T  | p. L120F  | Missense    | Yes |
| <i>SLC24A3</i>   | ENSG00000185052 | HCC06T | g.chr20: 19514102G>T | p. G176C  | Missense    | Yes |
| <i>INSM1</i>     | ENSG00000173404 | HCC06T | g.chr20: 20297225C>T | p. P105L  | Missense    | Yes |
| <i>CST2</i>      | ENSG00000170369 | HCC13T | g.chr20: 23755236C>T | p. W21X   | Nonsense    | Yes |
| <i>ASXL1</i>     | ENSG00000171456 | HCC08T | g.chr20: 30487750G>T | p. E1192X | Nonsense    | Yes |
| <i>SNTA1</i>     | ENSG00000101400 | HCC11T | g.chr20: 31461770A>C | p. S357A  | Missense    | Yes |
| <i>ACTR5</i>     | ENSG00000101442 | HCC10T | g.chr20: 36814273C>T | p. P231S  | Missense    | Yes |
| <i>WFDC9</i>     | ENSG00000180205 | HCC07T | g.chr20: 43670851A>G | p. I35T   | Missense    | Yes |
| <i>SLC12A5</i>   | ENSG00000124140 | HCC06T | g.chr20: 44113845A>G | p. N769S  | Missense    | Yes |
| <i>ZNF1</i>      | ENSG00000124201 | HCC03T | g.chr20: 47297239T>C | p. N1910S | Missense    | Yes |
| <i>PRIC285</i>   | ENSG00000130589 | HCC07T | g.chr20: 61661104T>C | p. Q2630R | Missense    | Yes |
| <i>LIME1</i>     | ENSG00000203896 | HCC08T | g.chr20: 61840051C>T | p. Q114X  | Nonsense    | Yes |
| <i>IFNAR1</i>    | ENSG00000142166 | HCC08T | g.chr21: 33629744A>G | p. I41V   | Missense    | Yes |
| <i>PKNOX1</i>    | ENSG00000160199 | HCC03T | g.chr21: 43303266G>A | p. E72K   | Missense    | Yes |
| <i>COL6A2</i>    | ENSG00000142173 | HCC07T | g.chr21: 46356327C>A | p. T41N   | Missense    | Yes |
| <i>CLDN5</i>     | ENSG00000184113 | HCC08T | g.chr22: 17891651G>A | p. A43V   | Missense    | Yes |
| <i>VPREB1</i>    | ENSG00000169575 | HCC08T | g.chr22: 20929519A>T | p. R70X   | Nonsense    | Yes |
| <i>CABIN1</i>    | ENSG00000099991 | HCC11T | g.chr22: 22786518G>C | p. V511L  | Missense    | Yes |
| <i>ADORA2A</i>   | ENSG00000128271 | HCC07T | g.chr22: 23167391G>C | p. K391N  | Missense    | Yes |
| <i>TFIP1</i>     | ENSG00000100109 | HCC08T | g.chr22: 25225410A>T | p. L330H  | Missense    | Yes |
| <i>EWSR1</i>     | ENSG00000182944 | HCC10T | g.chr22: 28024807G>C | p. G501A  | Missense    | Yes |
| <i>SFI1</i>      | ENSG00000198089 | HCC03T | g.chr22: 30332322T>G | p. L688X  | Nonsense    | Yes |
| <i>SAMM50</i>    | ENSG00000100347 | HCC10T | g.chr22: 42717522C>T | p. R423C  | Missense    | Yes |
| <i>KCNH8</i>     | ENSG00000183960 | HCC04T | g.chr3: 19473420T>C  | p. F661S  | Missense    | Yes |
| <i>XYLB</i>      | ENSG00000093217 | HCC10T | g.chr3: 38429470C>T  | p. Q525X  | Nonsense    | Yes |
| <i>CTNNB1</i>    | ENSG00000168036 | HCC08T | g.chr3: 41241102A>G  | p. D32G   | Missense    | Yes |
| <i>CTNNB1</i>    | ENSG00000168036 | HCC07T | g.chr3: 41241108G>T  | p. G34V   | Missense    | Yes |
| <i>CTNNB1</i>    | ENSG00000168036 | HCC03T | g.chr3: 41241108G>T  | p. G34V   | Missense    | Yes |
| <i>CTNNB1</i>    | ENSG00000168036 | HCC10T | g.chr3: 41241114A>C  | p. H36P   | Missense    | Yes |
| <i>CTNNB1</i>    | ENSG00000168036 | HCC07T | g.chr3: 41241140T>C  | p. S45P   | Missense    | Yes |
| <i>PTH1R</i>     | ENSG00000160801 | HCC08T | g.chr3: 46915231C>G  | p. F238L  | Missense    | Yes |
| <i>SCAP</i>      | ENSG00000114650 | HCC12T | g.chr3: 47445142T>A  | p. Y92F   | Missense    | Yes |
| <i>WDR6</i>      | ENSG00000178252 | HCC11T | g.chr3: 49024476G>T  | p. A169S  | Missense    | Yes |
| <i>MAPKAPK3</i>  | ENSG00000114738 | HCC08T | g.chr3: 50658635G>C  | p. K255N  | Missense    | Yes |
| <i>PRICKLE2</i>  | ENSG00000163637 | HCC11T | g.chr3: 64060194C>T  | p. S703N  | Missense    | Yes |

|                 |                 |        |                      |           |          |     |
|-----------------|-----------------|--------|----------------------|-----------|----------|-----|
| <i>EPHA3</i>    | ENSG00000044524 | HCC07T | g.chr3: 89563026G>C  | p. G725R  | Missense | Yes |
| <i>CBLB</i>     | ENSG00000114423 | HCC11T | g.chr3: 106903987G>A | p. P534S  | Missense | Yes |
| <i>CCDC80</i>   | ENSG00000091986 | HCC07T | g.chr3: 113840898C>T | p. R182K  | Missense | Yes |
| <i>SIDT1</i>    | ENSG00000072858 | HCC13T | g.chr3: 114794570T>A | p. F344I  | Missense | Yes |
| <i>IGSF11</i>   | ENSG00000144847 | HCC10T | g.chr3: 120131752T>C | p. Q37R   | Missense | Yes |
| <i>KTELC1</i>   | ENSG00000163389 | HCC13T | g.chr3: 120693071G>T | p. V328L  | Missense | Yes |
| <i>GOLGB1</i>   | ENSG00000173230 | HCC04T | g.chr3: 122895716T>G | p. E2110A | Missense | Yes |
| <i>SEC61A1</i>  | ENSG00000058262 | HCC10T | g.chr3: 129271142A>T | p. I460F  | Missense | Yes |
| <i>RAB43</i>    | ENSG00000172780 | HCC07T | g.chr3: 130296671C>G | p. R79P   | Missense | Yes |
| <i>XRN1</i>     | ENSG00000114127 | HCC10T | g.chr3: 143620139T>C | p. N415D  | Missense | Yes |
| <i>AADACL2</i>  | ENSG00000197953 | HCC09T | g.chr3: 152957614G>T | p. V228L  | Missense | Yes |
| <i>MECOM</i>    | ENSG00000085276 | HCC04T | g.chr3: 170316507C>A | p. G428V  | Missense | Yes |
| <i>DVL3</i>     | ENSG00000161202 | HCC07T | g.chr3: 185364798A>T | p. D94V   | Missense | Yes |
| <i>PSMD2</i>    | ENSG00000175166 | HCC11T | g.chr3: 185506409C>G | p. L567V  | Missense | Yes |
| <i>TMEM44</i>   | ENSG00000145014 | HCC07T | g.chr3: 195812971C>T | p. S327N  | Missense | Yes |
| <i>ZDHHC19</i>  | ENSG00000163958 | HCC07T | g.chr3: 197419825A>C | p. F138V  | Missense | Yes |
| <i>OTOP1</i>    | ENSG00000163982 | HCC07T | g.chr4: 4250663T>C   | p. I267V  | Missense | Yes |
| <i>DHX15</i>    | ENSG00000109606 | HCC08T | g.chr4: 24187026T>C  | p. I149V  | Missense | Yes |
| <i>FIP1L1</i>   | ENSG00000145216 | HCC07T | g.chr4: 53940152A>G  | p. E45G   | Missense | Yes |
| <i>STAP1</i>    | ENSG00000035720 | HCC11T | g.chr4: 68123717T>A  | p. I71K   | Missense | Yes |
| <i>EPGN</i>     | ENSG00000182585 | HCC10T | g.chr4: 75397646C>T  | p. T92I   | Missense | Yes |
| <i>PRKG2</i>    | ENSG00000138669 | HCC07T | g.chr4: 82311896T>A  | p. N239Y  | Missense | Yes |
| <i>IL21</i>     | ENSG00000138684 | HCC04T | g.chr4: 123761517G>A | p. R34C   | Missense | Yes |
| <i>FAT4</i>     | ENSG00000196159 | HCC07T | g.chr4: 126590252T>A | p. Y2877X | Nonsense | Yes |
| <i>PCDH10</i>   | ENSG00000138650 | HCC12T | g.chr4: 134293182C>A | p. H813N  | Missense | Yes |
| <i>RXFP1</i>    | ENSG00000171509 | HCC07T | g.chr4: 159789169A>T | p. S609C  | Missense | Yes |
| <i>RXFP1</i>    | ENSG00000171509 | HCC07T | g.chr4: 159789170G>A | p. S609N  | Missense | Yes |
| <i>RAPGEF2</i>  | ENSG00000109756 | HCC08T | g.chr4: 160470611A>G | p. K273R  | Missense | Yes |
| <i>TRIM61</i>   | ENSG00000183439 | HCC03T | g.chr4: 166110258C>T | p. C116Y  | Missense | Yes |
| <i>DDX60</i>    | ENSG00000137628 | HCC08T | g.chr4: 169465862G>A | p. S45L   | Missense | Yes |
| <i>CEP72</i>    | ENSG00000112877 | HCC10T | g.chr5: 690839A>G    | p. D371G  | Missense | Yes |
| <i>ZDHHC11</i>  | ENSG00000188818 | HCC13T | g.chr5: 886915G>T    | p. A303D  | Missense | Yes |
| <i>FASTKD3</i>  | ENSG00000124279 | HCC03T | g.chr5: 7919906T>C   | p. K431E  | Missense | Yes |
| <i>MTRR</i>     | ENSG00000124275 | HCC07T | g.chr5: 7945940G>T   | p. G518C  | Missense | Yes |
| <i>SLC1A3</i>   | ENSG00000079215 | HCC13T | g.chr5: 36716292A>G  | p. E378G  | Missense | Yes |
| <i>NIPBL</i>    | ENSG00000164190 | HCC10T | g.chr5: 37039124C>T  | p. S1258L | Missense | Yes |
| <i>ITGA2</i>    | ENSG00000164171 | HCC08T | g.chr5: 52413282T>A  | p. L1048X | Nonsense | Yes |
| <i>MRPS36</i>   | ENSG00000134056 | HCC08T | g.chr5: 68557939C>T  | p. P21S   | Missense | Yes |
| <i>MARVELD2</i> | ENSG00000152939 | HCC10T | g.chr5: 68751179A>G  | p. I71V   | Missense | Yes |
| <i>OCLN</i>     | ENSG00000197822 | HCC03T | g.chr5: 68840800G>A  | p. A43T   | Missense | Yes |
| <i>ZFYVE16</i>  | ENSG00000039319 | HCC09T | g.chr5: 79774737A>C  | p. N820T  | Missense | Yes |
| <i>MBLAC2</i>   | ENSG00000176055 | HCC07T | g.chr5: 89793099G>A  | p. Q161X  | Nonsense | Yes |
| <i>NUDT12</i>   | ENSG00000112874 | HCC08T | g.chr5: 102914553T>C | p. K433E  | Missense | Yes |
| <i>DMXL1</i>    | ENSG00000172869 | HCC13T | g.chr5: 118435231T>C | p. I23T   | Missense | Yes |
| <i>DMXL1</i>    | ENSG00000172869 | HCC07T | g.chr5: 118497683T>A | p. V722D  | Missense | Yes |
| <i>SLC27A6</i>  | ENSG00000113396 | HCC07T | g.chr5: 128329875A>G | p. K49R   | Missense | Yes |
| <i>C5orf20</i>  | ENSG00000251380 | HCC09T | g.chr5: 134813195T>A | p. M112L  | Missense | Yes |
| <i>NEUROG1</i>  | ENSG00000181965 | HCC06T | g.chr5: 134898861T>C | p. Y140C  | Missense | Yes |
| <i>PCDHA5</i>   | ENSG00000204965 | HCC12T | g.chr5: 140181674G>A | p. V44I   | Missense | Yes |
| <i>PCDHB8</i>   | ENSG00000120322 | HCC07T | g.chr5: 140538950G>A | p. C384Y  | Missense | Yes |
| <i>PCDHB15</i>  | ENSG00000113248 | HCC07T | g.chr5: 140607294C>T | p. T655I  | Missense | Yes |
| <i>AFAP1L1</i>  | ENSG00000157510 | HCC10T | g.chr5: 148675930G>A | p. A380T  | Missense | Yes |
| <i>DOCK2</i>    | ENSG00000134516 | HCC07T | g.chr5: 169407149T>C | p. Y1342H | Missense | Yes |
| <i>ZFP2</i>     | ENSG00000198939 | HCC08T | g.chr5: 178291309A>G | p. Y130C  | Missense | Yes |
| <i>EXOC2</i>    | ENSG00000112685 | HCC10T | g.chr6: 509087T>C    | p. I579V  | Missense | Yes |
| <i>HIVEP1</i>   | ENSG00000095951 | HCC03T | g.chr6: 12230520A>T  | p. I836F  | Missense | Yes |
| <i>HIST1H1E</i> | ENSG00000168298 | HCC06T | g.chr6: 26264833G>T  | p. R79L   | Missense | Yes |
| <i>OR12D3</i>   | ENSG00000112462 | HCC08T | g.chr6: 29431291T>C  | p. I221V  | Missense | Yes |
| <i>NCR3</i>     | ENSG00000204475 | HCC12T | g.chr6: 31665700G>A  | p. R76C   | Missense | Yes |
| <i>RDBP</i>     | ENSG00000204356 | HCC10T | g.chr6: 32030103A>C  | p. F280V  | Missense | Yes |

|                  |                 |        |                               |           |             |     |
|------------------|-----------------|--------|-------------------------------|-----------|-------------|-----|
| <i>ITPR3</i>     | ENSG00000096433 | HCC04T | g.chr6: 33741619T>A           | p. V480E  | Missense    | Yes |
| <i>GRM4</i>      | ENSG00000124493 | HCC13T | g.chr6: 34208926C>T           | p. C109Y  | Missense    | Yes |
| <i>CDKN1A</i>    | ENSG00000124762 | HCC08T | g.chr6: 36760061_36760062dupG | fs        | Indel       | Yes |
| <i>MOCS1</i>     | ENSG00000124615 | HCC06T | g.chr6: 39985628G>A           | p. A344V  | Missense    | Yes |
| <i>CUL7</i>      | ENSG00000044090 | HCC10T | g.chr6: 43122625T>A           | p. I790F  | Missense    | Yes |
| <i>MIR113B</i>   | MI0000822       | HCC09T | g.chr6: 52121744G>C           | p. G22A   | Missense    | Yes |
| <i>BAI3</i>      | ENSG00000135298 | HCC13T | g.chr6: 70099594T>G           | p. L1054R | Missense    | Yes |
| <i>FUT9</i>      | ENSG00000172461 | HCC06T | g.chr6: 96758526C>A           | p. Y258X  | Nonsense    | Yes |
| <i>C6orf58</i>   | ENSG00000184530 | HCC06T | g.chr6: 127940076C>T          | p. S18F   | Missense    | Yes |
| <i>MAP3K4</i>    | ENSG00000085511 | HCC13T | g.chr6: 161390966C>T          | p. R558C  | Missense    | Yes |
| <i>THBS2</i>     | ENSG00000186340 | HCC07T | g.chr6: 169371699C>T          | p. D718N  | Missense    | Yes |
| <i>PHF10</i>     | ENSG00000130024 | HCC03T | g.chr6: 169856818G>A          | p. R159X  | Nonsense    | Yes |
| <i>CHST12</i>    | ENSG00000136213 | HCC03T | g.chr7: 2439939G>T            | p. W380L  | Missense    | Yes |
| <i>EVX1</i>      | ENSG00000106038 | HCC11T | g.chr7: 27252091A>C           | p. H249P  | Missense    | Yes |
| <i>CREB5</i>     | ENSG00000146592 | HCC13T | g.chr7: 28576646A>G           | p. I144V  | Missense    | Yes |
| <i>SUN3</i>      | ENSG00000164744 | HCC04T | g.chr7: 48035051T>C           | p. K4E    | Missense    | Yes |
| <i>HGF</i>       | ENSG00000019991 | HCC08T | g.chr7: 81210655T>C           | p. Y272C  | Missense    | Yes |
| <i>TFR2</i>      | ENSG00000106327 | HCC06T | g.chr7: 100064904C>T          | p. R433K  | Missense    | Yes |
| <i>TRIP6</i>     | ENSG00000087077 | HCC09T | g.chr7: 100306227A>C          | p. T309P  | Missense    | Yes |
| <i>POT1</i>      | ENSG00000128513 | HCC08T | g.chr7: 124319565T>C          | p. K39E   | Missense    | Yes |
| <i>ZNF467</i>    | ENSG00000181444 | HCC08T | g.chr7: 149093941G>A          | p. R195C  | Missense    | Yes |
| <i>ZNF775</i>    | ENSG00000196456 | HCC07T | g.chr7: 149724792G>T          | p. S97I   | Missense    | Yes |
| <i>CRYGN</i>     | ENSG00000127377 | HCC11T | g.chr7: 150766203C>A          | p. D28Y   | Missense    | Yes |
| <i>USP17L2</i>   | ENSG00000223443 | HCC06T | g.chr8: 12033009C>T           | p. A224T  | Missense    | Yes |
| <i>C8orf41</i>   | ENSG00000129696 | HCC06T | g.chr8: 33480861G>T           | p. H354Q  | Missense    | Yes |
| <i>BRF2</i>      | ENSG00000104221 | HCC06T | g.chr8: 37821582A>G           | p. W282R  | Missense    | Yes |
| <i>SFRP1</i>     | ENSG00000104332 | HCC07T | g.chr8: 41241905T>G           | p. K295Q  | Missense    | Yes |
| <i>POLB</i>      | ENSG00000070501 | HCC07T | g.chr8: 42346592A>G           | p. N281S  | Missense    | Yes |
| <i>DNAJC5B</i>   | ENSG00000147570 | HCC12T | g.chr8: 67174804A>C           | p. Y195S  | Missense    | Yes |
| <i>MMP16</i>     | ENSG00000156103 | HCC04T | g.chr8: 89278611G>A           | p. P58L   | Missense    | Yes |
| <i>COX6C</i>     | ENSG00000164919 | HCC03T | g.chr8: 100973359T>C          | p. M23V   | Missense    | Yes |
| <i>UBR5</i>      | ENSG00000104517 | HCC06T | g.chr8: 103367857C>T          | p. A1708T | Missense    | Yes |
| <i>RIMS2</i>     | ENSG00000176406 | HCC11T | g.chr8: 104966929T>A          | p. V117E  | Missense    | Yes |
| <i>FER1L6</i>    | ENSG00000214814 | HCC07T | g.chr8: 125163810A>G          | p. K1441E | Missense    | Yes |
| <i>FAM135B</i>   | ENSG00000147724 | HCC07T | g.chr8: 139232971C>G          | p. E977Q  | Missense    | Yes |
| <i>DMRT2</i>     | ENSG00000173253 | HCC10T | g.chr9: 1047119A>G            | p. N511S  | Missense    | Yes |
| <i>BNC2</i>      | ENSG00000173068 | HCC06T | g.chr9: 16409126T>C           | p. Y1054C | Missense    | Yes |
| <i>IFNA10</i>    | ENSG00000186803 | HCC13T | g.chr9: 21196972C>G           | p. G42A   | Missense    | Yes |
| <i>CNTNAP3</i>   | ENSG00000106714 | HCC08T | g.chr9: 39078510G>C           | p. L1044V | Missense    | Yes |
| <i>CNTNAP3</i>   | ENSG00000106714 | HCC08T | g.chr9: 39078517C>A           | p. M1041I | Missense    | Yes |
| <i>ANKRD20A4</i> | ENSG00000172014 | HCC08T | g.chr9: 68680931G>A           | p. V207I  | Missense    | Yes |
| <i>FAM189A2</i>  | ENSG00000135063 | HCC07T | g.chr9: 71188462T>A           | p. Y197X  | Nonsense    | Yes |
| <i>TRPM6</i>     | ENSG00000119121 | HCC03T | g.chr9: 76626450G>A           | p. A322V  | Missense    | Yes |
| <i>C9orf47</i>   | ENSG00000186354 | HCC06T | g.chr9: 90795783T>A           | p. I18N   | Missense    | Yes |
| <i>FBP1</i>      | ENSG00000165140 | HCC10T | g.chr9: 96412059T>C           | p. M178V  | Missense    | Yes |
| <i>COL15A1</i>   | ENSG00000204291 | HCC09T | g.chr9: 100789457C>A          | p. P237T  | Missense    | Yes |
| <i>TGFBR1</i>    | ENSG00000106799 | HCC07T | g.chr9: 100939960A>C          | IVS3-2    | Splice site | Yes |
| <i>AKNA</i>      | ENSG00000106948 | HCC13T | g.chr9: 116163989C>T          | p. R647H  | Missense    | Yes |
| <i>DENND1A</i>   | ENSG00000119522 | HCC13T | g.chr9: 125184403C>T          | p. R720H  | Missense    | Yes |
| <i>SPTAN1</i>    | ENSG00000197694 | HCC03T | g.chr9: 130428645T>A          | p. L2140H | Missense    | Yes |
| <i>SETX</i>      | ENSG00000107290 | HCC11T | g.chr9: 134193940A>T          | p. S956T  | Missense    | Yes |
| <i>DBH</i>       | ENSG00000123454 | HCC06T | g.chr9: 135511512A>G          | p. Y494C  | Missense    | Yes |
| <i>ABCA2</i>     | ENSG00000107331 | HCC08T | g.chr9: 139029954T>C          | p. K1170E | Missense    | Yes |
| <i>NHS</i>       | ENSG00000188158 | HCC04T | g.chrX: 17304298C>A           | p. A166E  | Missense    | Yes |
| <i>PHEX</i>      | ENSG00000102174 | HCC12T | g.chrX: 22155619C>A           | p. N680K  | Missense    | Yes |
| <i>MAGEB6</i>    | ENSG00000176746 | HCC08T | g.chrX: 26122731C>T           | p. P283S  | Missense    | Yes |
| <i>MAOA</i>      | ENSG00000189221 | HCC06T | g.chrX: 43476914A>C           | p. E327A  | Missense    | Yes |
| <i>RBM10</i>     | ENSG00000182872 | HCC04T | g.chrX: 46915548G>A           | p. A127T  | Missense    | Yes |
| <i>SHROOM4</i>   | ENSG00000158352 | HCC11T | g.chrX: 50393976G>T           | p. L613M  | Missense    | Yes |
| <i>FOXR2</i>     | ENSG00000189299 | HCC06T | g.chrX: 55667047C>A           | p. P60T   | Missense    | Yes |

|                 |                 |        |                      |           |          |     |
|-----------------|-----------------|--------|----------------------|-----------|----------|-----|
| <i>SLC7A3</i>   | ENSG00000165349 | HCC04T | g.chrX: 70064476G>A  | p. Q314X  | Nonsense | Yes |
| <i>OGT</i>      | ENSG00000147162 | HCC07T | g.chrX: 70672822A>T  | p. D36V   | Missense | Yes |
| <i>PHKA1</i>    | ENSG00000067177 | HCC07T | g.chrX: 71747709C>T  | p. R807K  | Missense | Yes |
| <i>KIAA2022</i> | ENSG00000050030 | HCC10T | g.chrX: 73877047G>T  | p. P1357H | Missense | Yes |
| <i>GPR174</i>   | ENSG00000147138 | HCC10T | g.chrX: 78313440T>C  | p. C94R   | Missense | Yes |
| <i>FAM46D</i>   | ENSG00000174016 | HCC11T | g.chrX: 79585830C>A  | p. P379Q  | Missense | Yes |
| <i>CYLC1</i>    | ENSG00000183035 | HCC03T | g.chrX: 83015343A>G  | p. K324R  | Missense | Yes |
| <i>ZNF711</i>   | ENSG00000147180 | HCC08T | g.chrX: 84406046A>G  | p. I244M  | Missense | Yes |
| <i>CPXCR1</i>   | ENSG00000147183 | HCC07T | g.chrX: 87895524G>T  | p. M151I  | Missense | Yes |
| <i>NOX1</i>     | ENSG0000007952  | HCC06T | g.chrX: 100003863G>C | p. R253G  | Missense | Yes |
| <i>RGAG1</i>    | ENSG00000181110 | HCC10T | g.chrX: 109582840G>T | p. R780M  | Missense | Yes |
| <i>ODZ1</i>     | ENSG0000009694  | HCC08T | g.chrX: 123925105T>G | p. Q60P   | Missense | Yes |
| <i>BCORL1</i>   | ENSG00000085185 | HCC03T | g.chrX: 128982675C>A | p. T1159N | Missense | Yes |
| <i>IGSF1</i>    | ENSG00000147255 | HCC07T | g.chrX: 130244197G>T | p. T383N  | Missense | Yes |
| <i>MAGEC3</i>   | ENSG00000165509 | HCC09T | g.chrX: 140810991C>A | p. P368Q  | Missense | Yes |
| <i>MTM1</i>     | ENSG00000171100 | HCC10T | g.chrX: 149577111A>G | p. I405V  | Missense | Yes |
| <i>PASD1</i>    | ENSG00000166049 | HCC04T | g.chrX: 150567775T>C | p. M221T  | Missense | Yes |
| <i>FAM58A</i>   | ENSG00000147382 | HCC11T | g.chrX: 152513291G>A | p. R111C  | Missense | Yes |
| <i>F8</i>       | ENSG00000185010 | HCC03T | g.chrX: 153847985G>T | p. A394D  | Missense | Yes |
| <i>TSPY1</i>    | ENSG00000168757 | HCC13T | g.chrY: 6174373G>T   | p. V22L   | Missense | Yes |
| <i>TSPY2</i>    | ENSG00000168757 | HCC13T | g.chrY: 6174373G>T   | p. V22L   | Missense | Yes |

\*Coordinates refer to the human reference genome hg18 release (NCBI 36.1, March 2006).

**Supplementary Table 4.** Somatic mutations in *CTNNB1*, *TP53*, *ARID2*, *DMXL1* and *NLRP1* in human hepatocellular carcinomas

| Sample  | Gene          | Transcript Accession | Nucleotide (genomic)*                                           | Amino acid (protein) | Mutation type |
|---------|---------------|----------------------|-----------------------------------------------------------------|----------------------|---------------|
| HCC07T  | <i>ARID2</i>  | ENST00000334344      | g.chr12: 44517604G>T                                            | p.E393X              | Nonsense      |
| HCC08T  | <i>ARID2</i>  | ENST00000334344      | g.chr12: 44531120C>T                                            | p.Q983X              | Nonsense      |
| HCC05T  | <i>ARID2</i>  | ENST00000334344      | g.chr12: 44410093G>A                                            | Splice site          | Splice site   |
| HCC15T  | <i>ARID2</i>  | ENST00000334344      | g.chr12: 44409960_44409961dupA                                  | fs                   | Indel         |
| HCC21T  | <i>ARID2</i>  | ENST00000334344      | g.chr12: 44530611delC                                           | fs                   | Indel         |
| HCC200T | <i>ARID2</i>  | ENST00000334344      | g.chr12: 44411280delA                                           | fs                   | Indel         |
| HCC366T | <i>ARID2</i>  | ENST00000334344      | g.chr12: 44573689G>T                                            | p.E1761X             | Nonsense      |
| HCC202T | <i>ARID2</i>  | ENST00000334344      | g.chr12: 44532238delA                                           | fs                   | Indel         |
| HCC202T | <i>ARID2</i>  | ENST00000334344      | g.chr12: 44532586_44532592delACATTCT                            | fs                   | Indel         |
| HCC47T  | <i>ARID2</i>  | ENST00000334344      | g.chr12: 44532926_44532929delGTAC                               | fs                   | Indel         |
| HCC07T  | <i>DMXL1</i>  | ENST00000311085      | g.chr5: 118497683T>A                                            | p.V722D              | Missense      |
| HCC13T  | <i>DMXL1</i>  | ENST00000311085      | g.chr5: 118435231T>C                                            | p.I23T               | Missense      |
| HCC203T | <i>DMXL1</i>  | ENST00000311085      | g.chr5: 118507471C>T                                            | p.Q805X              | Nonsense      |
| HCC204T | <i>DMXL1</i>  | ENST00000311085      | g.chr5: 118468783A>T                                            | p.S99C               | Missense      |
| HCC205T | <i>DMXL1</i>  | ENST00000311085      | g.chr5: 118534664A>T                                            | p.E2093D             | Missense      |
| HCC206T | <i>DMXL1</i>  | ENST00000311085      | g.chr5: 118492942_118492944delAGA                               | in-frame del         | Indel         |
| HCC03T  | <i>NLRP1</i>  | ENST00000269280      | g.chr17: 5402995T>G                                             | p.K582T              | Missense      |
| HCC07T  | <i>NLRP1</i>  | ENST00000269280      | g.chr17: 5376933C>T                                             | p.D1077N             | Missense      |
| HCC207T | <i>NLRP1</i>  | ENST00000269280      | g.chr17: 5403147C>T                                             | p.M531I              | Missense      |
| HCC207T | <i>NLRP1</i>  | ENST00000269280      | g.chr17: 5403146G>T                                             | p.Q532K              | Missense      |
| HCC208T | <i>NLRP1</i>  | ENST00000269280      | g.chr17: 5383537T>A                                             | p.Q931L              | Missense      |
| HCC03T  | <i>CTNNB1</i> | ENST00000405570      | g.chr3: 41241108G>T                                             | p.G34V               | Missense      |
| HCC07T  | <i>CTNNB1</i> | ENST00000405570      | g.chr3: 41241140T>C                                             | p.S45P               | Missense      |
| HCC07T  | <i>CTNNB1</i> | ENST00000405570      | g.chr3: 41241108G>T                                             | p.G34V               | Missense      |
| HCC08T  | <i>CTNNB1</i> | ENST00000405570      | g.chr3: 41241102A>G                                             | p.D32G               | Missense      |
| HCC10T  | <i>CTNNB1</i> | ENST00000405570      | g.chr3: 41241114A>C                                             | p.H36P               | Missense      |
| HCC209T | <i>CTNNB1</i> | ENST00000405570      | g.chr3: 41241107G>A                                             | p.G34R               | Missense      |
| HCC210T | <i>CTNNB1</i> | ENST00000405570      | g.chr3: 41241108G>A                                             | p.G34E               | Missense      |
| HCC211T | <i>CTNNB1</i> | ENST00000405570      | g.chr3: 41241101G>T                                             | p.D32Y               | Missense      |
| HCC203T | <i>CTNNB1</i> | ENST00000405570      | g.chr3: 41241129C>T                                             | p.T41I               | Missense      |
| HCC212T | <i>CTNNB1</i> | ENST00000405570      | g.chr3: 41241102A>T                                             | p.D32V               | Missense      |
| HCC213T | <i>CTNNB1</i> | ENST00000405570      | g.chr3: 41241141C>T                                             | p.S45F               | Missense      |
| HCC214T | <i>CTNNB1</i> | ENST00000405570      | g.chr3: 41241128A>G                                             | p.T41A               | Missense      |
| HCC215T | <i>CTNNB1</i> | ENST00000405570      | g.chr3: 41241140T>C                                             | p.S45P               | Missense      |
| HCC05T  | <i>CTNNB1</i> | ENST00000405570      | g.chr3: 41241102A>G                                             | p.D32G               | Missense      |
| HCC15T  | <i>CTNNB1</i> | ENST00000405570      | g.chr3: 41241101G>C                                             | p.D32H               | Missense      |
| HCC24T  | <i>CTNNB1</i> | ENST00000405570      | g.chr3: 41249915T>A                                             | p.N387K              | Missense      |
| HCC26T  | <i>CTNNB1</i> | ENST00000405570      | g.chr3: 41241128A>G                                             | p.T41A               | Missense      |
| HCC200T | <i>CTNNB1</i> | ENST00000405570      | g.chr3: 41241114A>C                                             | p.H36P               | Missense      |
| HCC165T | <i>CTNNB1</i> | ENST00000405570      | g.chr3: 41241140T>C                                             | p.S45P               | Missense      |
| HCC507T | <i>CTNNB1</i> | ENST00000405570      | g.chr3: 41241116T>C                                             | p.S37P               | Missense      |
| HCC50T  | <i>CTNNB1</i> | ENST00000405570      | g.chr3: 41241140T>C                                             | p.S45P               | Missense      |
| HCC556T | <i>CTNNB1</i> | ENST00000405570      | g.chr3: 41241141C>T                                             | p.S45F               | Missense      |
| HCC567T | <i>CTNNB1</i> | ENST00000405570      | g.chr3: 41241105C>T                                             | p.S33F               | Missense      |
| HCC219T | <i>CTNNB1</i> | ENST00000405570      | g.chr3: 41241105C>G                                             | p.S33C               | Missense      |
| HCC202T | <i>CTNNB1</i> | ENST00000405570      | g.chr3: 41243770A>T                                             | p.K335I              | Missense      |
| HCC220T | <i>CTNNB1</i> | ENST00000405570      | g.chr3: 41241129C>T                                             | p.T41I               | Missense      |
| HCC221T | <i>CTNNB1</i> | ENST00000405570      | g.chr3: 41241117_41241149<br>delCTGGTGCCACTACCACAGCTCCTTCTGAGTG | in-frame del         | Indel         |
| HCC222T | <i>CTNNB1</i> | ENST00000405570      | g.chr3: 41241140T>C                                             | p.S45P               | Missense      |
| HCC223T | <i>CTNNB1</i> | ENST00000405570      | g.chr3: 41241128A>G                                             | p.T41A               | Missense      |
| HCC06T  | <i>TP53</i>   | ENST00000269305      | g.chr17: 7514728G>A                                             | p.R343X              | Nonsense      |
| HCC11T  | <i>TP53</i>   | ENST00000269305      | g.chr17: 7519270delC                                            | fs                   | Indel         |

|         |      |                 |                                |              |             |
|---------|------|-----------------|--------------------------------|--------------|-------------|
| HCC13T  | TP53 | ENST00000269305 | g.chr17: 7520144_7520145insG   | fs           | Indel       |
| HCC209T | TP53 | ENST00000269305 | g.chr17: 7520317T>A            | Splice site  | Splice site |
| HCC210T | TP53 | ENST00000269305 | g.chr17: 7518294A>C            | p.C238G      | missense    |
| HCC211T | TP53 | ENST00000269305 | g.chr17: 7517846G>A            | p.R273C      | missense    |
| HCC224T | TP53 | ENST00000269305 | g.chr17: 7519095C>T            | Splice site  | Splice site |
| HCC225T | TP53 | ENST00000269305 | g.chr17: 7517842A>G            | p.V274A      | missense    |
| HCC226T | TP53 | ENST00000269305 | g.chr17: 7517852C>A            | p.E271X      | Nonsense    |
| HCC227T | TP53 | ENST00000269305 | g.chr17: 7520424C>T            | Splice site  | Splice site |
| HCC228T | TP53 | ENST00000269305 | g.chr17: 7517653T>A            | Splice site  | Splice site |
| HCC229T | TP53 | ENST00000269305 | g.chr17: 7517845C>T            | p.R273H      | missense    |
| HCC230T | TP53 | ENST00000269305 | g.chr17: 7519094A>T            | Splice site  | Splice site |
| HCC231T | TP53 | ENST00000269305 | g.chr17: 7519251C>T            | p.C135Y      | missense    |
| HCC207T | TP53 | ENST00000269305 | g.chr17: 7519135T>A            | p.R174W      | missense    |
| HCC232T | TP53 | ENST00000269305 | g.chr17: 7517866C>A            | p.G266V      | missense    |
| HCC233T | TP53 | ENST00000269305 | g.chr17: 7518996T>G            | p.H193P      | missense    |
| HCC234T | TP53 | ENST00000269305 | g.chr17: 7518334C>T            | Splice site  | Splice site |
| HCC204T | TP53 | ENST00000269305 | g.chr17: 7520063delC           | fs           | Indel       |
| HCC235T | TP53 | ENST00000269305 | g.chr17: 7517849C>T            | p.V272M      | missense    |
| HCC370T | TP53 | ENST00000269305 | g.chr17: 7518252_7518254delGGA | in-frame del | indel       |
| HCC416T | TP53 | ENST00000269305 | g.chr17: 7517839C>A            | p.C275F      | missense    |
| HCC46T  | TP53 | ENST00000269305 | g.chr17: 7518275_7518276insGG  | fs           | Indel       |
| HCC477T | TP53 | ENST00000269305 | g.chr17: 7519114G>A            | p.R181C      | missense    |
| HCC477T | TP53 | ENST00000269305 | g.chr17: 7518936C>T            | p.R213Q      | missense    |
| HCC482T | TP53 | ENST00000269305 | g.chr17: 7518259C>A (homo)     | p.R249S      | missense    |
| HCC554T | TP53 | ENST00000269305 | g.chr17: 7519233C>T            | p.C141Y      | missense    |
| HCC241T | TP53 | ENST00000269305 | g.chr17: 7519128C>A            | p.C176F      | missense    |
| HCC242T | TP53 | ENST00000269305 | g.chr17: 7517809T>A            | p.E285V      | missense    |
| HCC243T | TP53 | ENST00000269305 | g.chr17: 7518272C>A            | p.G245V      | missense    |
| HCC244T | TP53 | ENST00000269305 | g.chr17: 7517608_7517609insTTC | in-frame ins | Indel       |
| HCC254T | TP53 | ENST00000269305 | g.chr17: 7517845C>T            | p.R273H      | missense    |
| HCC246T | TP53 | ENST00000269305 | g.chr17: 7517863delC           | fs           | Indel       |
| HCC247T | TP53 | ENST00000269305 | g.chr17: 7518259C>A            | p.R249S      | missense    |
| HCC248T | TP53 | ENST00000269305 | g.chr17: 7519186C>A (homo)     | p.V157F      | missense    |
| HCC221T | TP53 | ENST00000269305 | g.chr17: 7517809T>C            | p.E285G      | missense    |
| HCC249T | TP53 | ENST00000269305 | g.chr17: 7519217C>T            | p.W146X      | Nonsense    |
| HCC250T | TP53 | ENST00000269305 | g.chr17: 7520210C>A            | p.E68X       | Nonsense    |
| HCC251T | TP53 | ENST00000269305 | g.chr17: 7514742C>T            | p.R337H      | missense    |
| HCC44T  | TP53 | ENST00000269305 | g.chr17: 7518259C>A            | p.R249S      | missense    |

\*Coordinates refer to the human reference genome hg18 release (NCBI 36.1, March 2006).

## Supplementary Table 5. Primers used for PCR amplification and sequencing

| Gene Symbol   | Transcript IDs  | Coding Exon Number | Genomic Region of Interest <sup>‡</sup> | M13 PCR primer sequence <sup>†</sup> | PCR primer sequence       |
|---------------|-----------------|--------------------|-----------------------------------------|--------------------------------------|---------------------------|
| <i>ARID2</i>  | ENST00000334344 | 1                  | chr12: 44409883-44409982                | CTCTGGTAGGAAGCGCTGG                  | GGTGTAGAGACCGTGAAGATCC    |
| <i>ARID2</i>  | ENST00000334344 | 2                  | chr12: 44410090-44410191                | AGGGACTCGCTTTCCTGG                   | CCAGCGAGAGGGAATACAAA      |
| <i>ARID2</i>  | ENST00000334344 | 3                  | chr12: 44411263-44411368                | TACCGATCGATCCGAAACAC                 | CTGTTTGGTGTGCAAGGTTTG     |
| <i>ARID2</i>  | ENST00000334344 | 4                  | chr12: 44491464-44491605                | TGTGCAAAGGAAGGGAATAAC                | TTGCATTGATTTTATCTGCCGG    |
| <i>ARID2</i>  | ENST00000334344 | 5                  | chr12: 44497716-44497942                | GCTGTGTCTGTATTCAAGGGA                | AGCAATCGTCTCAACTCAGGA     |
| <i>ARID2</i>  | ENST00000334344 | 6                  | chr12: 44501466-44501541                | AAATGAAAGCCAGTGTGGAGTAA              | TTGTTGGCTAGCTGCATGT       |
| <i>ARID2</i>  | ENST00000334344 | 7                  | chr12: 44516635-44516709                | AGCCACCATACCTAGCCTGTG                | CACTGCAATCTGAAGTACCCG     |
| <i>ARID2</i>  | ENST00000334344 | 8                  | chr12: 44516787-44517045                | TCTGACAGAAACAAGTCTCATGG              | GCCATTTCTGAAATTAAGCATC    |
| <i>ARID2</i>  | ENST00000334344 | 9                  | chr12: 44517367-44517471                | AACGTTATGCAACATTGCTCTG               | GCAGCACATCAGGTAAGTGAG     |
| <i>ARID2</i>  | ENST00000334344 | 10                 | chr12: 44517544-44517761                | TCATCTGATGTTTCACTGTTACAAA            | GGAAACAAGTATGCCGTGAGGA    |
| <i>ARID2</i>  | ENST00000334344 | 11                 | chr12: 44519375-44519550                | CCAAAATCCACITTTGCCCTAC               | ATGTCTCCACCAGTATGGC       |
| <i>ARID2</i>  | ENST00000334344 | 12                 | chr12: 44526902-44526991                | TTCTGGATGCTGTAGAATACATTTCC           | GCCTGGTATGATATGTGCTCC     |
| <i>ARID2</i>  | ENST00000334344 | 13                 | chr12: 44528882-44529024                | ATTGCTCCACATGCGCTTAA                 | CCTCCACCACACTATAAACCCTAC  |
| <i>ARID2</i>  | ENST00000334344 | 14                 | chr12: 44529626-44529830                | TCCTTGTCTTCCATCCTTGC                 | GAAGATTGGTTGGCAACAGG      |
| <i>ARID2</i>  | ENST00000334344 | 15                 | chr12: 44530082-44530142                | TCTGTGATGATCTCCTGCTCC                | AAAGCACTTGTGTGTCATCAG     |
| <i>ARID2</i>  | ENST00000334344 | 15                 | chr12: 44530143-44530354                | GAGTGCCTGAAGGGATCTGTC                | TTTCAGAGGACTCCTGTTGCC     |
| <i>ARID2</i>  | ENST00000334344 | 15                 | chr12: 44530355-44530637                | CTGTGGCACAACCTGTTTCAA                | GACTTTGGGACACCAAGTAAG     |
| <i>ARID2</i>  | ENST00000334344 | 15                 | chr12: 44530638-44530920                | GTAATTCCACAGCAGTCTCCATT              | TGGCTGTGCATAAAGTTTTCG     |
| <i>ARID2</i>  | ENST00000334344 | 15                 | chr12: 44530921-44531203                | CTATTGCTGGTCCCAAGTC                  | TTACCACCTGGTGTGAAGGA      |
| <i>ARID2</i>  | ENST00000334344 | 15                 | chr12: 44531204-44531489                | TGCTGGGCTATTTGAGATCAGT               | TCTTCCAGCTGTGCAGACAGT     |
| <i>ARID2</i>  | ENST00000334344 | 15                 | chr12: 44531490-44531732                | GAAACGTGGCTTCAACACC                  | GGAAAGTCCAACTCCTGTCTGC    |
| <i>ARID2</i>  | ENST00000334344 | 15                 | chr12: 44531733-44531900                | TGAGTTCTGTTTCCAGATGC                 | CCATAACAGTTGTGCCAAAATCG   |
| <i>ARID2</i>  | ENST00000334344 | 15                 | chr12: 44531901-44532069                | TGAGTTCTGTTTCCAGATGC                 | GAACGCAGACAGGAGTTGG       |
| <i>ARID2</i>  | ENST00000334344 | 15                 | chr12: 44532070-44532333                | AGGAAGCAAAGGAAGCAACAG                | CACATAATTGCTGTGTTGCCG     |
| <i>ARID2</i>  | ENST00000334344 | 15                 | chr12: 44532334-44532662                | TCTGCGACTGTTTCCCTATC                 | AGGTGTGGTGAAGCATCTGG      |
| <i>ARID2</i>  | ENST00000334344 | 15                 | chr12: 44532663-44532818                | GCCCAAGTGATGTTGTCTCAC                | ATAACTTACTCGGGGACCAC      |
| <i>ARID2</i>  | ENST00000334344 | 15                 | chr12: 44532819-44532950                | AGGACAGGTTGGATACAAGTGA               | TTCGGTCTCAAAATGGCACAG     |
| <i>ARID2</i>  | ENST00000334344 | 16                 | chr12: 44540847-44541003                | TGCTAAAGTTAGTGGTTCTAAAG              | CAATGTGGTATTACCTTCTGTTG   |
| <i>ARID2</i>  | ENST00000334344 | 17                 | chr12: 44571826-44571972                | AAGCAAGAGAATGGCACGTC                 | TGATTCCACTTGGAAATTAAGCAG  |
| <i>ARID2</i>  | ENST00000334344 | 18                 | chr12: 44572057-44572150                | ATGCAGCAACTGAACATGGAG                | ATTGCTGGTTTATGGCAGAG      |
| <i>ARID2</i>  | ENST00000334344 | 19                 | chr12: 44573466-44573597                | CTCACCTGCGACCACTTC                   | GGCAGGGTGGTACATAGTTGTC    |
| <i>ARID2</i>  | ENST00000334344 | 20                 | chr12: 44573676-44573775                | TGGCCTGACCTAGGCATAAAC                | GATCGCTTGAACCCCTTATC      |
| <i>ARID2</i>  | ENST00000334344 | 21                 | chr12: 44584980-44585132                | ACGAAAGCTTCTCTCAGCATC                | ATGTCTTCTCTCTCTCTGTC      |
| <i>CTNNB1</i> | ENST00000405570 | 1                  | chr3: 41240560-41240580                 | GCCTGACAAAGTAAGCAGGGAG               | AGACCATGAGGTCTGCGTTTC     |
| <i>CTNNB1</i> | ENST00000405570 | 2                  | chr3: 41241017-41241252                 | TCCACAGTTCAGCATTTACCTAAG             | AAATATTTCAATGGGTTCATACAC  |
| <i>CTNNB1</i> | ENST00000405570 | 3                  | chr3: 41241445-41241706                 | TGCAGCCTTATTAACCAACCAC               | CCTTACTGAAATGCAGAAATGCAG  |
| <i>CTNNB1</i> | ENST00000405570 | 4                  | chr3: 41241825-41242071                 | ACGAGGACCAGGTAAGCAATG                | ATCCACTGGTGAAGTGGGAAG     |
| <i>CTNNB1</i> | ENST00000405570 | 5                  | chr3: 41242151-41242360                 | AGAAACCAATCCCAACAACCC                | GGCCATCTTTAAGCTCGGAGG     |
| <i>CTNNB1</i> | ENST00000405570 | 6                  | chr3: 41243699-41243851                 | CTTTGGCTGCAAACTGAATAGG               | GCAAGCTGGCTGAAATTTCTG     |
| <i>CTNNB1</i> | ENST00000405570 | 7                  | chr3: 41249832-41249943                 | CAGAAGGACACCTCCTAAGGC                | AAGGATGGTGAATCCATCCCTTC   |
| <i>CTNNB1</i> | ENST00000405570 | 8                  | chr3: 41250020-41250366                 | GTAACACTGGTGCCATGGGAAT               | CAGCCATCCAAACAGCTAGAGA    |
| <i>CTNNB1</i> | ENST00000405570 | 9                  | chr3: 41250630-41250796                 | AGGAAGTATGGCTGCGATAGG                | GAAAGAAGTTCAGGATCCTTTGG   |
| <i>CTNNB1</i> | ENST00000405570 | 10                 | chr3: 41252215-41252342                 | TGGAACTCTTCTTCTCTCC                  | GTGAAATGTGAAATCTCCTCCC    |
| <i>CTNNB1</i> | ENST00000405570 | 11                 | chr3: 41252840-41252998                 | GCAGCTGCATATGTCGCTAAG                | AATTGGGAATGTTTGCACCAC     |
| <i>CTNNB1</i> | ENST00000405570 | 12                 | chr3: 41253079-41253208                 | AAGGAACCAAGCCTTTAGCAG                | AGGGAAACATCAATGCAAAATG    |
| <i>CTNNB1</i> | ENST00000405570 | 13                 | chr3: 41254507-41254575                 | GAGCAAAACCCGCTTCTCTG                 | GCCTGGCAGCATAATATAGG      |
| <i>CTNNB1</i> | ENST00000405570 | 14                 | chr3: 41255625-41255841                 | ACCACCTCCCAACCAAC                    | CTTTGGATCGCCCTAACCTCAG    |
| <i>TP53</i>   | ENST00000269305 | 1                  | chr17: 7513648-7513737                  | CCATCTTGATTTGAAATCCCG                | ATTGCAAGCAAGGGTTCAAAG     |
| <i>TP53</i>   | ENST00000269305 | 2                  | chr17: 7514648-7514762                  | AGCTGCCTTTGACCATGAAG                 | ATTGCACCATTTGCACTCCC      |
| <i>TP53</i>   | ENST00000359597 | 1                  | chr17: 7517346-7517386                  | AGTTTATCAGGAAGTAACACCATCG            | CAAAGACAAATGGCTCCTGGTT    |
| <i>TP53</i>   | ENST00000269305 | 3                  | chr17: 7517574-7517655                  | GGAGCACTAAGCGAGGTAAGC                | TTGCTTTGAGGCATCACTGC      |
| <i>TP53</i>   | ENST00000269305 | 4                  | chr17: 7517740-7517884                  | TTGGGCAGTGCTAGGAAAGAG                | GTGGGAGTAGATGGAAGCCTG     |
| <i>TP53</i>   | ENST00000269305 | 5                  | chr17: 7518220-7518337                  | AGAAAATCGGTAAGAGGTGGGC               | CATCCTGGCTAACGGTGAAGC     |
| <i>TP53</i>   | ENST00000269305 | 6                  | chr17: 7518898-7519018                  | CTGCTCAGATAGCGATGGTG                 | AGGCCCTTAGCCTCTGTAAGC     |
| <i>TP53</i>   | ENST00000269305 | 7                  | chr17: 7519092-7519283                  | GGGCCAGACCTAAGAGCAATC                | AAGCTCTGAGGTTGATGACGC     |
| <i>TP53</i>   | ENST00000269305 | 8                  | chr17: 7520033-7520319                  | GAGGAAATCCCAAAGTTCCAAAC              | ACGTTCTGTAAGGACAAGGG      |
| <i>TP53</i>   | ENST00000269305 | 9                  | chr17: 7520421-7520450                  | CAGTCAGATCCTAGCGTCGAG                | AAATACCTCAATGCTGGGAG      |
| <i>TP53</i>   | ENST00000269305 | 10                 | chr17: 7520560-7520641                  | AGGGTTGGAAGTGCTCATGC                 | AGCCCAACCTTGTCTTAC        |
| <i>DMXL1</i>  | ENST00000311085 | 1                  | chr5: 118435160-118435254               | GGAAGGAGGAGGGAAGC                    | CCTTAGTTCTCAAGGGCCAGG     |
| <i>DMXL1</i>  | ENST00000311085 | 2                  | chr5: 118461569-118461702               | TCTTTGAAACAAAGCCAAAGTCTC             | GGTAAGGGAATAGTGCCTAAATG   |
| <i>DMXL1</i>  | ENST00000311085 | 3                  | chr5: 118465525-118465604               | CATTCTTAAGCATCAGTGAATGAAA            | CAACAAATCAATGGCACAATTT    |
| <i>DMXL1</i>  | ENST00000311085 | 4                  | chr5: 118468770-118468856               | CACACCCAGCAGAAGTGAATAC               | TTGACCACAGATTATGGATATCTC  |
| <i>DMXL1</i>  | ENST00000311085 | 5                  | chr5: 118473741-118473881               | TTTGTAGAACAAGGAAATAGAGA              | AAATACAGCCTTCTCTCCGT      |
| <i>DMXL1</i>  | ENST00000311085 | 6                  | chr5: 118478065-118478139               | CACAAAAGATGTGGGTGTAAGAC              | TTAGACGGGATAGTGGGTGTG     |
| <i>DMXL1</i>  | ENST00000311085 | 7                  | chr5: 118479748-118479934               | GGCTCAGAAGTCTGTAACATAGG              | TCTGTGCTCAACGCTCTTCC      |
| <i>DMXL1</i>  | ENST00000311085 | 8                  | chr5: 118482405-118482602               | TTTCTCATTTGTAACCTTATGTTGG            | TTCAGCCAAGTCAAATGTAATCA   |
| <i>DMXL1</i>  | ENST00000311085 | 9                  | chr5: 118484561-118484737               | GGCTAAGACAGTCACTCCAAAT               | GGATTAAGAGAACAGCCAGGTACTT |
| <i>DMXL1</i>  | ENST00000311085 | 10                 | chr5: 118492801-118493021               | CCATGTTGGATCATGTCATTG                | TGAAAGAGAAGGACCTTACAGG    |

|       |                 |    |                           |                                |                            |
|-------|-----------------|----|---------------------------|--------------------------------|----------------------------|
| DMXL1 | ENST00000311085 | 11 | chr5: 118496722-118496983 | GCTATCCAGAAGCTCGGTAATTC        | TGGAATTCGGAACAAAGGAC       |
| DMXL1 | ENST00000311085 | 12 | chr5: 118497084-118497259 | GCTAGTTGGCATGTGGATTG           | GCCACTGATTCAGAGAACCATC     |
| DMXL1 | ENST00000311085 | 12 | chr5: 118497260-118497618 | CTGGGTAAAGAGTGGGCAGC           | TGCCGTGACCAAGAATGTTGAC     |
| DMXL1 | ENST00000311085 | 12 | chr5: 118497619-118497776 | GGCTACAAAGCATGCACTAGG          | GGACACCAGATGTTGATAACCC     |
| DMXL1 | ENST00000311085 | 13 | chr5: 118497858-118497987 | GGCTGCCACTCTTATACCC            | CTTTCAAAGAGTGAAGAATGTT     |
| DMXL1 | ENST00000311085 | 14 | chr5: 118507431-118507528 | GGACTATATTTAGCCCACTTGAA        | CAATAACCATGGATGAGGAACC     |
| DMXL1 | ENST00000311085 | 15 | chr5: 118508126-118508236 | CCATACGCTTACGTTCTGCTG          | CCAAATTCATTTAATACTGCCTAA   |
| DMXL1 | ENST00000311085 | 16 | chr5: 118510427-118510554 | ACTGTGTTGAAGCCTTAGGTAAA        | GAATGGCTTTAAGAAAATATGCC    |
| DMXL1 | ENST00000311085 | 17 | chr5: 118510839-118511068 | AGCCATTCTCATTTAAATGGTGATA      | TTTCCATTTCTAGTTCTGTGTGGA   |
| DMXL1 | ENST00000311085 | 18 | chr5: 118512329-118512575 | AAACATACAGCCAAGATGCC           | GAATGCTGCTCAAGGACCC        |
| DMXL1 | ENST00000311085 | 18 | chr5: 118512576-118512920 | AAATGCCAGGTTTCTTACC            | AGATGGAGAACTGCCACGTC       |
| DMXL1 | ENST00000311085 | 18 | chr5: 118512921-118513127 | CCATATCCACTGAAGGATCGAA         | CATATCCTGACTGTAGGAAATGGA   |
| DMXL1 | ENST00000311085 | 18 | chr5: 118513128-118513334 | GCAATGCCTTAAACAAGATGGG         | GGTAAGGAAACCCCTGGCATT      |
| DMXL1 | ENST00000311085 | 18 | chr5: 118513335-118513648 | AGTGGCCAGAAAGAACCTGAG          | ACTGCATTCGATCCTTCAGTT      |
| DMXL1 | ENST00000311085 | 18 | chr5: 118513649-118513961 | TTACCTGGCTTCTGTCTCGG           | CTTGGTAAAGTCCGGAGAGCC      |
| DMXL1 | ENST00000311085 | 18 | chr5: 118513962-118514019 | CAAGCATCATCCCACCTCAG           | TGGAGCAGATGTCTTTGATGG      |
| DMXL1 | ENST00000311085 | 19 | chr5: 118515519-118515634 | TCCTCCAGTATGTTCTCATTAACCTC     | AAGAAATGTTATATGCCATAATGGGG |
| DMXL1 | ENST00000311085 | 20 | chr5: 118528097-118528274 | GGCAGAGAAGATAGAAATGCC          | ACAGTGGAAATGGCCATAAGC      |
| DMXL1 | ENST00000311085 | 21 | chr5: 118528773-118528878 | ATGGATATGTGCCAGCCTTTC          | CCTCATCAGGTTTCTCCACTC      |
| DMXL1 | ENST00000311085 | 22 | chr5: 118530206-118530379 | TTTGGCCTTGTTATTTTCCA           | AAGTTAAGAACTGGCAGATGTTTCTA |
| DMXL1 | ENST00000311085 | 23 | chr5: 118531193-118531462 | AGACCATGAATTCAAATTTGTTG        | TGTTTCTTACTCTTCTTGAATTTT   |
| DMXL1 | ENST00000311085 | 24 | chr5: 118533780-118533969 | CCTTGATCCAACTTAAATGG           | ATGTGTTGTTGCTCTTCAGTGC     |
| DMXL1 | ENST00000311085 | 24 | chr5: 118533970-118534159 | TGAAACACAACACTGGTTGG           | TTTCCACACATAGAGCCTAAC      |
| DMXL1 | ENST00000311085 | 24 | chr5: 118534160-118534672 | TCCATTAAGTTGGATGCAAGG          | TTTGGTAGGCAAACTTCAG        |
| DMXL1 | ENST00000311085 | 24 | chr5: 118534673-118534878 | AGCTTCCCTAAAGCAACCC            | TGCATTTGGCAGAAATGAAG       |
| DMXL1 | ENST00000311085 | 25 | chr5: 118535368-118535567 | TTGAAATGCTGACTTCTCACATC        | GGAAACAACATAAATGGCAATG     |
| DMXL1 | ENST00000311085 | 26 | chr5: 118538851-118538935 | AGGGTTGAGATTCATCTGCC           | GGAAATAGTTTATGAGGCAAAAG    |
| DMXL1 | ENST00000311085 | 27 | chr5: 118540947-118541082 | ACTGTAATTCAGAAATGAGTGGTAA      | TTTCTCATTTGACTTATCTGTCCC   |
| DMXL1 | ENST00000311085 | 28 | chr5: 118541586-118541842 | AGAAGAAAGAAATCCGATTTGGG        | TCAGTGACAGCTATGTTGTTGTC    |
| DMXL1 | ENST00000311085 | 29 | chr5: 118553298-118553484 | GTGCTTATTTGTAGTTAACCTTAGCTCTTA | TGGAAATGATGCCGATACTAATGAAA |
| DMXL1 | ENST00000311085 | 30 | chr5: 118557418-118557568 | TGAGCAAGACTCTGTGAGGAA          | TGGCTGCTAAATTTATGATTC      |
| DMXL1 | ENST00000311085 | 31 | chr5: 118559961-118560054 | TCAGGTTGATTCCTGATAGTGG         | CGGATACATTTACAGATGTTGG     |
| DMXL1 | ENST00000311085 | 32 | chr5: 118561345-118561554 | CACCTCAGCCCGGATGAC             | CACCTGCACATCTCCCTCG        |
| DMXL1 | ENST00000311085 | 33 | chr5: 118566909-118567034 | TTGCCATATGTTTATGATACGTGTTT     | TGGCACCAAGGAAATGTTATC      |
| DMXL1 | ENST00000311085 | 34 | chr5: 118580491-118580585 | CCAGATTGCAATTTAAGGAACCTG       | ATGCAAGTACTAATTTGATGATGGC  |
| DMXL1 | ENST00000311085 | 35 | chr5: 118584062-118584191 | CATAAACGATCTCCAACCTGAAGC       | TTATTTAAAGCTCTTGGCCACC     |
| DMXL1 | ENST00000311085 | 36 | chr5: 118584530-118584679 | TTAAATCATCTTTATCCATTAACCTAGA   | TTGAGATATGAGGTCATGTTGG     |
| DMXL1 | ENST00000311085 | 37 | chr5: 118588299-118588367 | AAAGGTTCCACACATTTCTT           | GATCCTAGTCAAGTAACTGCCAAA   |
| DMXL1 | ENST00000311085 | 38 | chr5: 118596930-118597065 | TGCTCTATCGTATTTGAGGATG         | ACTACTACCCACGGAGCTGTTCC    |
| DMXL1 | ENST00000311085 | 39 | chr5: 118600912-118601012 | GCAAAAGTACTGAGAACACAGG         | GGGTGCACACTGAGGGTAAGG      |
| DMXL1 | ENST00000311085 | 40 | chr5: 118602579-118602678 | CAGAGGATTTAAGAAAGCCAGAAAAC     | GGGCAGGAGATGACACTTTC       |
| DMXL1 | ENST00000311085 | 41 | chr5: 118604009-118604069 | CTTTCAAATCCTGCCATCCTG          | CAAGATCTCCACCACTTCC        |
| DMXL1 | ENST00000311085 | 42 | chr5: 118607949-118608174 | GCAATTAGCACTGCTGACTACAAA       | CACCCAGTTGTTTCCCATCT       |
| DMXL1 | ENST00000311085 | 43 | chr5: 118610585-118610817 | TCAGTGCATCAAGGGCAAAG           | TACCTTAGGTGCTGCTCCCTC      |
| NLRP1 | ENST00000262467 | 1  | chr17: 5345854-5345920    | TGGTTACAGCGTTTCAGACTC          | GACTCACTAAAGCCATTTCTC      |
| NLRP1 | ENST00000269280 | 1  | chr17: 5358794-5359121    | GAGGGATGCAGAGATGAGAGAG         | GATGGCAACTGTTTGCAGAG       |
| NLRP1 | ENST00000269280 | 2  | chr17: 5359513-5359565    | TCCTTCTTCTCTCTTCC              | CTCTAAGGACCCCTCCAGCTC      |
| NLRP1 | ENST00000269280 | 3  | chr17: 5361786-5361935    | TGTGTCTCATCCTTCTGTGG           | TGCGCCAGCTCCTTCTT          |
| NLRP1 | ENST00000269280 | 4  | chr17: 5364921-5365060    | AAACACACAGATGCACCATCC          | CCTCGATTTACTCTGTCCCTG      |
| NLRP1 | ENST00000269280 | 5  | chr17: 5365564-5365834    | CAAGAGCGAACTCTGTCTCAA          | CTGTACAAGAGGCCCATCTT       |
| NLRP1 | ENST00000269280 | 6  | chr17: 5374521-5374752    | TAAGGAAAGCCAAACACCCCTC         | TGAAAGCCACTGTACCGTATCC     |
| NLRP1 | ENST00000269280 | 7  | chr17: 5376862-5377032    | CCCTTACAGTGAGCCATAGG           | CCAGTGGTGAGTGAGTTGG        |
| NLRP1 | ENST00000262467 | 7  | chr17: 5377332-5377432    | GAGCTCAAACAATCCTCCAC           | GTGTGCTGCAGCTTCTGCTC       |
| NLRP1 | ENST00000269280 | 9  | chr17: 5377937-5378036    | TTTAGTGGGAATGTCATGTGGAC        | CCATAGACGTTCTGGAGAGGG      |
| NLRP1 | ENST00000269280 | 10 | chr17: 5380891-5380988    | AGGTGACAGGTCACAGGATTC          | GACAAGTGCACCTCACTCTGG      |
| NLRP1 | ENST00000269280 | 11 | chr17: 5383455-5383633    | AAGGCCACAGATGCTGAGAAG          | TGTAAGAAACCTGGGTTGGC       |
| NLRP1 | ENST00000269280 | 12 | chr17: 5385897-5386075    | GAGATCCTGTAGGCTCCTCC           | ATGGTTGCTTATGGGTGCTG       |
| NLRP1 | ENST00000269280 | 13 | chr17: 5397426-5397604    | ACAAGACAAATCCCTCAGCC           | GCTGGTCAGTACTGGAGATGG      |
| NLRP1 | ENST00000269280 | 14 | chr17: 5402379-5402668    | TGCTTTGGAGATGAGAAGGG           | GGAGACCCTGATCCTTTAGCC      |
| NLRP1 | ENST00000269280 | 14 | chr17: 5402669-5403018    | ACTTCCAAGACCACCAACCC           | CCATCACTTGTGTCAAGAACG      |
| NLRP1 | ENST00000269280 | 14 | chr17: 5403019-5403392    | CAAGAAAGTGGAGATGATGGC          | TGGTGTAGATGAGCCAGGATG      |
| NLRP1 | ENST00000269280 | 14 | chr17: 5403393-5403722    | AGCTGGCTGATTATGTGGAG           | ATTCCTTCTGCTGGACTCAG       |
| NLRP1 | ENST00000269280 | 14 | chr17: 5403723-5404091    | AGACTCACCACTTGGACTGG           | GCAGTGTGGCTGGCTGGAGTAG     |
| NLRP1 | ENST00000269280 | 15 | chr17: 5425899-5426110    | CTTAGCCTGCCAACCTGGTC           | GACCCATCTCTCAGGACTGTTG     |
| NLRP1 | ENST00000269280 | 16 | chr17: 5426710-5426894    | AGGAGACCAGCTCAGTTCCC           | CCATGCACAGACATGATCCTC      |
| NLRP1 | ENST00000269280 | 17 | chr17: 5427727-5428005    | AAGAGACGGTAAAGCCAAGG           | AGGGAGGCTCAGTGGTG          |

\*Coordinates refer to the human reference genome hg18 release (NCBI 36.1, March 2006).  
†M13 denotes the universal sequencing primer 5'-GTTAAACGACGGCCAGT-3'.

**Supplementary Table 6.** Clinical characteristics of 23 patients with HCV-associated hepatocellular carcinoma used in the first prevalence screen

| Sample  | Age | Sex    | Self-reported ethnicity | Geographic location | Etiology | Stage         | Source of tumor DNA | Histological type        | Source of matched normal DNA |
|---------|-----|--------|-------------------------|---------------------|----------|---------------|---------------------|--------------------------|------------------------------|
| HCC05T  | 62  | Female | Black                   | United States       | HCV      | T2            | Primary tumor       | Hepatocellular carcinoma | non-neoplastic liver         |
| HCC14T  | 60  | Male   | Black                   | United States       | HCV      | T1            | Primary tumor       | Hepatocellular carcinoma | non-neoplastic liver         |
| HCC15T  | 46  | Male   | White                   | United States       | HCV      | T1            | Primary tumor       | Hepatocellular carcinoma | non-neoplastic liver         |
| HCC16T  | 51  | Male   | Black                   | United States       | HCV      | T2            | Primary tumor       | Hepatocellular carcinoma | non-neoplastic liver         |
| HCC17T  | 51  | Male   | White                   | United States       | HCV      | T2            | Primary tumor       | Hepatocellular carcinoma | non-neoplastic liver         |
| HCC18T  | 75  | Male   | White                   | United States       | HCV      | T1            | Primary tumor       | Hepatocellular carcinoma | non-neoplastic liver         |
| HCC19T  | 56  | Male   | White                   | United States       | HCV      | T1            | Primary tumor       | Hepatocellular carcinoma | non-neoplastic liver         |
| HCC20T  | 55  | Male   | Black                   | United States       | HCV      | T2            | Primary tumor       | Hepatocellular carcinoma | non-neoplastic liver         |
| HCC21T  | 70  | Female | Hispanic                | United States       | HCV      | T1            | Primary tumor       | Hepatocellular carcinoma | non-neoplastic liver         |
| HCC22T  | 65  | Male   | White                   | United States       | HCV      | T1            | Primary tumor       | Hepatocellular carcinoma | non-neoplastic liver         |
| HCC23T  | 67  | Male   | White                   | United States       | HCV      | T1            | Primary tumor       | Hepatocellular carcinoma | non-neoplastic liver         |
| HCC24T  | 66  | Male   | Arabic                  | United States       | HCV      | T2            | Primary tumor       | Hepatocellular carcinoma | non-neoplastic liver         |
| HCC25T  | 65  | Male   | White                   | United States       | HCV      | T1            | Primary tumor       | Hepatocellular carcinoma | non-neoplastic liver         |
| HCC26T  | 56  | Male   | White                   | United States       | HCV      | T1            | Primary tumor       | Hepatocellular carcinoma | non-neoplastic liver         |
| HCC27T  | 52  | Female | White                   | United States       | HCV      | T2            | Primary tumor       | Hepatocellular carcinoma | non-neoplastic liver         |
| HCC28T  | 65  | Female | White                   | United States       | HCV      | T2            | Primary tumor       | Hepatocellular carcinoma | non-neoplastic liver         |
| HCC29T  | 73  | Male   | White                   | United States       | HCV      | T1            | Primary tumor       | Hepatocellular carcinoma | non-neoplastic liver         |
| HCC30T  | 73  | Female | Asian                   | United States       | HCV      | T1            | Primary tumor       | Hepatocellular carcinoma | non-neoplastic liver         |
| HCC44T  | 70  | Female | Not available           | Netherlands         | HCV      | Not available | Primary tumor       | Hepatocellular carcinoma | non-neoplastic liver         |
| HCC45T  | 49  | Female | Not available           | Netherlands         | HCV      | Not available | Primary tumor       | Hepatocellular carcinoma | non-neoplastic liver         |
| HCC47T  | 53  | Male   | Not available           | Netherlands         | HCV      | Not available | Primary tumor       | Hepatocellular carcinoma | non-neoplastic liver         |
| HCC252T | 55  | Female | Black                   | United States       | HCV      | T1            | Primary tumor       | Hepatocellular carcinoma | non-neoplastic liver         |
| HCC253T | 61  | Male   | White                   | United States       | HCV      | T1            | Primary tumor       | Hepatocellular carcinoma | non-neoplastic liver         |

**Supplementary Table 7. Clinical characteristics of 106 patients with hepatocellular carcinomas used in the second prevalence screen**

| Sample  | Age | Sex    | Self-reported ethnicity | Geographic location | Etiology                                          | Stage         | Source of tumor DNA | Histological type        | Source of matched normal DNA |
|---------|-----|--------|-------------------------|---------------------|---------------------------------------------------|---------------|---------------------|--------------------------|------------------------------|
| HCC41T  | 67  | Male   | not available           | Netherlands         | HBV                                               | Not available | Primary tumor       | Hepatocellular carcinoma | non-neoplastic liver         |
| HCC42T  | 55  | Male   | not available           | Netherlands         | HBV                                               | Not available | Primary tumor       | Hepatocellular carcinoma | non-neoplastic liver         |
| HCC43T  | 64  | Male   | not available           | Netherlands         | HBV                                               | Not available | Primary tumor       | Hepatocellular carcinoma | non-neoplastic liver         |
| HCC46T  | 54  | Male   | not available           | Netherlands         | HBV                                               | Not available | Primary tumor       | Hepatocellular carcinoma | non-neoplastic liver         |
| HCC48T  | 48  | Male   | not available           | Netherlands         | HBV                                               | Not available | Primary tumor       | Hepatocellular carcinoma | non-neoplastic liver         |
| HCC235T | 77  | Female | White                   | United States       | No known underlying liver disease                 | T2            | Primary tumor       | Hepatocellular carcinoma | non-neoplastic liver         |
| HCC200T | 60  | Female | White                   | United States       | Cryptogenic cirrhosis                             | T2            | Primary tumor       | Hepatocellular carcinoma | non-neoplastic liver         |
| HCC276T | 63  | Male   | Asian                   | United States       | HBV                                               | T1            | Primary tumor       | Hepatocellular carcinoma | non-neoplastic liver         |
| HCC255T | 80  | Male   | White                   | United States       | No known underlying liver disease                 | T1            | Primary tumor       | Hepatocellular carcinoma | non-neoplastic liver         |
| HCC16T  | 25  | Female | White                   | United States       | HCC arising in hepatic adenoma                    | T1            | Primary tumor       | Hepatocellular carcinoma | non-neoplastic liver         |
| HCC165T | 59  | Male   | White                   | United States       | No known underlying liver disease                 | T1            | Primary tumor       | Hepatocellular carcinoma | non-neoplastic liver         |
| HCC50T  | 70  | Male   | White                   | United States       | No known underlying liver disease                 | T1            | Primary tumor       | Hepatocellular carcinoma | non-neoplastic liver         |
| HCC187T | 54  | Male   | White                   | United States       | Cryptogenic cirrhosis                             | T1            | Primary tumor       | Hepatocellular carcinoma | non-neoplastic liver         |
| HCC300T | 60  | Male   | White                   | United States       | Alcohol, Alpha-1-antitrypsin deficiency           | T2            | Primary tumor       | Hepatocellular carcinoma | non-neoplastic liver         |
| HCC158T | 59  | Female | Asian                   | United States       | HBV                                               | T2            | Primary tumor       | Hepatocellular carcinoma | non-neoplastic liver         |
| HCC140T | 53  | Male   | White                   | United States       | Cryptogenic cirrhosis                             | T1            | Primary tumor       | Hepatocellular carcinoma | non-neoplastic liver         |
| HCC245T | 54  | Female | Black                   | United States       | Cryptogenic cirrhosis                             | T1            | Primary tumor       | Hepatocellular carcinoma | non-neoplastic liver         |
| HCC64T  | 63  | Male   | Black                   | United States       | Alcohol                                           | T2            | Primary tumor       | Hepatocellular carcinoma | non-neoplastic liver         |
| HCC1T   | 55  | Male   | White                   | United States       | No known underlying liver disease                 | T1            | Primary tumor       | Hepatocellular carcinoma | non-neoplastic liver         |
| HCC46T  | 71  | Male   | White                   | United States       | No known underlying liver disease, mild steatosis | T2            | Primary tumor       | Hepatocellular carcinoma | non-neoplastic liver         |
| HCC38T  | 65  | Male   | Black                   | United States       | HBV                                               | T2            | Primary tumor       | Hepatocellular carcinoma | non-neoplastic liver         |
| HCC366T | 62  | Male   | White                   | United States       | Alcohol                                           | T1            | Primary tumor       | Hepatocellular carcinoma | non-neoplastic liver         |
| HCC368T | 33  | Female | White                   | United States       | HCC arising in hepatic adenoma                    | T1            | Primary tumor       | Hepatocellular carcinoma | non-neoplastic liver         |
| HCC370T | 50  | Female | Black                   | United States       | No known underlying liver disease                 | T2            | Primary tumor       | Hepatocellular carcinoma | non-neoplastic liver         |
| HCC388T | 47  | Female | White                   | United States       | No known underlying liver disease                 | T2            | Primary tumor       | Hepatocellular carcinoma | non-neoplastic liver         |
| HCC467T | 19  | Female | Black                   | United States       | No known underlying liver disease                 | T3A           | Primary tumor       | Hepatocellular carcinoma | non-neoplastic liver         |
| HCC412T | 45  | Female | White                   | United States       | No known underlying liver disease                 | t1            | Primary tumor       | Hepatocellular carcinoma | non-neoplastic liver         |
| HCC413T | 48  | Female | White                   | United States       | HCC arising in hepatic adenoma                    | T1            | Primary tumor       | Hepatocellular carcinoma | non-neoplastic liver         |
| HCC416T | 76  | Male   | Asian                   | United States       | HBV                                               | T1            | Primary tumor       | Hepatocellular carcinoma | non-neoplastic liver         |
| HCC505T | 69  | Male   | Asian                   | United States       | No known underlying liver disease                 | T1            | Primary tumor       | Hepatocellular carcinoma | non-neoplastic liver         |
| HCC484T | 74  | Male   | White                   | United States       | No known underlying liver disease                 | T1            | Primary tumor       | Hepatocellular carcinoma | non-neoplastic liver         |
| HCC448T | 37  | Male   | Black                   | United States       | HBV                                               | T2            | Primary tumor       | Hepatocellular carcinoma | non-neoplastic liver         |
| HCC471T | 53  | Male   | White                   | United States       | Alpha-1-antitrypsin deficiency                    | T1            | Primary tumor       | Hepatocellular carcinoma | non-neoplastic liver         |
| HCC477T | 46  | Male   | Asian                   | United States       | HBV                                               | T2            | Primary tumor       | Hepatocellular carcinoma | non-neoplastic liver         |
| HCC482T | 65  | Female | Asian                   | United States       | HBV                                               | T1            | Primary tumor       | Hepatocellular carcinoma | non-neoplastic liver         |
| HCC492T | 48  | Female | White                   | United States       | HCC arising in hepatic adenoma                    | T1            | Primary tumor       | Hepatocellular carcinoma | non-neoplastic liver         |
| HCC507T | 60  | Male   | White                   | United States       | No known underlying liver disease                 | T1            | Primary tumor       | Hepatocellular carcinoma | non-neoplastic liver         |
| HCC521T | 64  | Female | White                   | United States       | No known underlying liver disease                 | T1            | Primary tumor       | Hepatocellular carcinoma | non-neoplastic liver         |
| HCC524T | 52  | Male   | Asian                   | United States       | HBV                                               | T1            | Primary tumor       | Hepatocellular carcinoma | non-neoplastic liver         |
| HCC553T | 74  | Female | White                   | United States       | No known underlying liver disease                 | T2            | Primary tumor       | Hepatocellular carcinoma | non-neoplastic liver         |
| HCC554T | 63  | Female | White                   | United States       | No known underlying liver disease                 | T2            | Primary tumor       | Hepatocellular carcinoma | non-neoplastic liver         |
| HCC556T | 69  | Male   | White                   | United States       | No known underlying liver disease                 | T2            | Primary tumor       | Hepatocellular carcinoma | non-neoplastic liver         |
| HCC571T | 73  | Male   | Asian                   | United States       | HBV                                               | T2            | Primary tumor       | Hepatocellular carcinoma | non-neoplastic liver         |
| HCC567T | 76  | Male   | White                   | United States       | HBV                                               | T1            | Primary tumor       | Hepatocellular carcinoma | non-neoplastic liver         |
| HCC568T | 64  | Male   | White                   | United States       | No known underlying liver disease                 | T1            | Primary tumor       | Hepatocellular carcinoma | non-neoplastic liver         |
| HCC219T | 58  | Male   | Asian                   | China               | Cirrhosis, alcohol                                | T1            | Primary tumor       | Hepatocellular carcinoma | non-neoplastic liver         |
| HCC205T | 66  | Male   | Asian                   | China               | Cirrhosis                                         | T1            | Primary tumor       | Hepatocellular carcinoma | non-neoplastic liver         |
| HCC256T | 62  | Male   | Asian                   | China               | Cirrhosis                                         | T1            | Primary tumor       | Hepatocellular carcinoma | non-neoplastic liver         |
| HCC257T | 47  | Female | Asian                   | China               | Cirrhosis                                         | T3a           | Primary tumor       | Hepatocellular carcinoma | non-neoplastic liver         |
| HCC209T | 63  | Male   | Asian                   | China               | HCV                                               | T1            | Primary tumor       | Hepatocellular carcinoma | non-neoplastic liver         |
| HCC210T | 64  | Male   | Asian                   | China               | HBV, HCV                                          | T3a           | Primary tumor       | Hepatocellular carcinoma | non-neoplastic liver         |
| HCC211T | 56  | Male   | Asian                   | China               | HCV                                               | T1            | Primary tumor       | Hepatocellular carcinoma | non-neoplastic liver         |
| HCC224T | 72  | Male   | Asian                   | China               | HCV                                               | T1            | Primary tumor       | Hepatocellular carcinoma | non-neoplastic liver         |
| HCC258T | 74  | Male   | Asian                   | China               | HBV                                               | T1            | Primary tumor       | Hepatocellular carcinoma | non-neoplastic liver         |
| HCC202T | 68  | Male   | Asian                   | China               | HBV                                               | T3            | Primary tumor       | Hepatocellular carcinoma | non-neoplastic liver         |
| HCC259T | 44  | Male   | Asian                   | China               | HBV                                               | T1            | Primary tumor       | Hepatocellular carcinoma | non-neoplastic liver         |
| HCC241T | 52  | Male   | Asian                   | China               | HBV                                               | T1            | Primary tumor       | Hepatocellular carcinoma | non-neoplastic liver         |
| HCC203T | 76  | Male   | Asian                   | China               | HCV                                               | T1            | Primary tumor       | Hepatocellular carcinoma | non-neoplastic liver         |
| HCC212T | 73  | Male   | Asian                   | China               | HCV                                               | T1            | Primary tumor       | Hepatocellular carcinoma | non-neoplastic liver         |
| HCC242T | 45  | Male   | Asian                   | China               | HBV                                               | T2            | Primary tumor       | Hepatocellular carcinoma | non-neoplastic liver         |
| HCC260T | 61  | Male   | Asian                   | China               | No underlying liver disease                       | T1            | Primary tumor       | Hepatocellular carcinoma | non-neoplastic liver         |
| HCC261T | 50  | Male   | Asian                   | China               | HBV                                               | T1            | Primary tumor       | Hepatocellular carcinoma | non-neoplastic liver         |
| HCC243T | 46  | Male   | Asian                   | China               | HBV                                               | T1            | Primary tumor       | Hepatocellular carcinoma | non-neoplastic liver         |
| HCC262T | 29  | Male   | Asian                   | China               | HBV                                               | T1            | Primary tumor       | Hepatocellular carcinoma | non-neoplastic liver         |
| HCC263T | 63  | Male   | Asian                   | China               | HBV                                               | T1            | Primary tumor       | Hepatocellular carcinoma | non-neoplastic liver         |
| HCC264T | 74  | Male   | Asian                   | China               | HCV                                               | T2            | Primary tumor       | Hepatocellular carcinoma | non-neoplastic liver         |
| HCC213T | 52  | Male   | Asian                   | China               | HCV                                               | T1            | Primary tumor       | Hepatocellular carcinoma | non-neoplastic liver         |
| HCC265T | 70  | Female | Asian                   | China               | HBV                                               | T3            | Primary tumor       | Hepatocellular carcinoma | non-neoplastic liver         |
| HCC244T | 50  | Male   | Asian                   | China               | HBV                                               | T1            | Primary tumor       | Hepatocellular carcinoma | non-neoplastic liver         |
| HCC225T | 57  | Female | Asian                   | China               | HBV, HCV                                          | T2            | Primary tumor       | Hepatocellular carcinoma | non-neoplastic liver         |
| HCC266T | 48  | Female | Asian                   | China               | HBV                                               | T2            | Primary tumor       | Hepatocellular carcinoma | non-neoplastic liver         |
| HCC254T | 59  | Male   | Asian                   | China               | Cirrhosis, alcohol                                | T2            | Primary tumor       | Hepatocellular carcinoma | non-neoplastic liver         |
| HCC226T | 68  | Female | Asian                   | China               | HCV                                               | T1            | Primary tumor       | Hepatocellular carcinoma | non-neoplastic liver         |
| HCC214T | 59  | Male   | Asian                   | China               | HBV                                               | T1            | Primary tumor       | Hepatocellular carcinoma | non-neoplastic liver         |

|         |    |        |       |       |                             |     |               |                          |                      |
|---------|----|--------|-------|-------|-----------------------------|-----|---------------|--------------------------|----------------------|
| HCC206T | 74 | Female | Asian | China | No underlying liver disease | T1  | Primary tumor | Hepatocellular carcinoma | non-neoplastic liver |
| HCC227T | 83 | Male   | Asian | China | HBV                         | T1  | Primary tumor | Hepatocellular carcinoma | non-neoplastic liver |
| HCC228T | 61 | Male   | Asian | China | HBV                         | T3a | Primary tumor | Hepatocellular carcinoma | non-neoplastic liver |
| HCC267T | 53 | Male   | Asian | China | HBV                         | T3a | Primary tumor | Hepatocellular carcinoma | non-neoplastic liver |
| HCC229T | 60 | Male   | Asian | China | HBV                         | T1  | Primary tumor | Hepatocellular carcinoma | non-neoplastic liver |
| HCC220T | 75 | Male   | Asian | China | No underlying liver disease | T1  | Primary tumor | Hepatocellular carcinoma | non-neoplastic liver |
| HCC230T | 48 | Male   | Asian | China | HBV                         | T3a | Primary tumor | Hepatocellular carcinoma | non-neoplastic liver |
| HCC215T | 60 | Male   | Asian | China | HBV                         | T2  | Primary tumor | Hepatocellular carcinoma | non-neoplastic liver |
| HCC231T | 47 | Male   | Asian | China | HBV                         | T1  | Primary tumor | Hepatocellular carcinoma | non-neoplastic liver |
| HCC207T | 53 | Male   | Asian | China | HBV                         | T1  | Primary tumor | Hepatocellular carcinoma | non-neoplastic liver |
| HCC268T | 69 | Male   | Asian | China | HBV                         | T1  | Primary tumor | Hepatocellular carcinoma | non-neoplastic liver |
| HCC269T | 56 | Female | Asian | China | HBV                         | T2  | Primary tumor | Hepatocellular carcinoma | non-neoplastic liver |
| HCC208T | 65 | Female | Asian | China | HBV                         | T1  | Primary tumor | Hepatocellular carcinoma | non-neoplastic liver |
| HCC246T | 74 | Male   | Asian | China | No underlying liver disease | T1  | Primary tumor | Hepatocellular carcinoma | non-neoplastic liver |
| HCC232T | 58 | Male   | Asian | China | HBV                         | T1  | Primary tumor | Hepatocellular carcinoma | non-neoplastic liver |
| HCC233T | 69 | Female | Asian | China | HBV                         | T1  | Primary tumor | Hepatocellular carcinoma | non-neoplastic liver |
| HCC270T | 61 | Female | Asian | China | HBV                         | T1  | Primary tumor | Hepatocellular carcinoma | non-neoplastic liver |
| HCC271T | 55 | Male   | Asian | China | HBV                         | T1  | Primary tumor | Hepatocellular carcinoma | non-neoplastic liver |
| HCC247T | 36 | Male   | Asian | China | HBV                         | T1  | Primary tumor | Hepatocellular carcinoma | non-neoplastic liver |
| HCC272T | 37 | Female | Asian | China | HBV                         | T3a | Primary tumor | Hepatocellular carcinoma | non-neoplastic liver |
| HCC248T | 53 | Male   | Asian | China | HBV                         | T1  | Primary tumor | Hepatocellular carcinoma | non-neoplastic liver |
| HCC221T | 52 | Male   | Asian | China | HBV                         | T2  | Primary tumor | Hepatocellular carcinoma | non-neoplastic liver |
| HCC249T | 55 | Male   | Asian | China | HBV                         | T1  | Primary tumor | Hepatocellular carcinoma | non-neoplastic liver |
| HCC273T | 52 | Female | Asian | China | Mild cirrhosis              | T3a | Primary tumor | Hepatocellular carcinoma | non-neoplastic liver |
| HCC234T | 77 | Male   | Asian | China | HCV                         | T2  | Primary tumor | Hepatocellular carcinoma | non-neoplastic liver |
| HCC222T | 72 | Male   | Asian | China | No underlying liver disease | T1  | Primary tumor | Hepatocellular carcinoma | non-neoplastic liver |
| HCC223T | 71 | Male   | Asian | China | Mild cirrhosis              | T2  | Primary tumor | Hepatocellular carcinoma | non-neoplastic liver |
| HCC250T | 47 | Male   | Asian | China | No underlying liver disease | T1  | Primary tumor | Hepatocellular carcinoma | non-neoplastic liver |
| HCC274T | 53 | Male   | Asian | China | HBV                         | T1  | Primary tumor | Hepatocellular carcinoma | non-neoplastic liver |
| HCC251T | 54 | Male   | Asian | China | No underlying liver disease | T1  | Primary tumor | Hepatocellular carcinoma | non-neoplastic liver |
| HCC275T | 48 | Female | Asian | China | HBV                         | T1  | Primary tumor | Hepatocellular carcinoma | non-neoplastic liver |
| HCC204T | 71 | Male   | Asian | China | HCV                         | T1  | Primary tumor | Hepatocellular carcinoma | non-neoplastic liver |

**Supplementary Table 8.** Comparison of five mutated genes, *TP53*, *CTNNB1*, *ARID2*, *DMXL1* and *NLRP1* in human hepatocellular carcinomas from different geographic locations

| Geographic locations     | Total cases | <i>TP53</i> mutations    | <i>CTNNB1</i> mutations | <i>ARID2</i> mutations | <i>DMXL1</i> mutations | <i>NLRP1</i> mutations |
|--------------------------|-------------|--------------------------|-------------------------|------------------------|------------------------|------------------------|
| United States and Europe | 78          | 11 (14.1%)               | 14 (17.9%)              | 8 (10.3%)              | 2 (2.6%)               | 2 (2.6%)               |
| China                    | 61          | 28 (45.9% <sup>§</sup> ) | 14 (23.0%)              | 1 (1.6%)               | 4 (6.6%)               | 2 (3.3%)               |

<sup>§</sup> Prevalence of *TP53* mutations in United States and Europe vs China,  $P < 0.0001$
